1 **Characterization of Telomeric Repeat-Containing RNA (TERRA) localization and protein**  
2 **interactions in Primordial Germ Cells of the mouse**

3  
4 **Running title:** Characterization of TERRA in mouse PGCs

5  
6 **Summary sentence:** TERRA transcription and interacting proteins during PGC development are  
7 regulated in a dynamic fashion that is dependent on gestational age and sex

8  
9 **Keywords:** TERRA, Primordial Germ Cells, Long non-coding RNA, Telomeres, SFPQ, NONO

10  
11 Miguel A. Brieño-Enríquez<sup>2</sup>, Stefannie L. Moak, Anyul Abud-Flores<sup>1</sup>, and Paula E. Cohen<sup>2</sup>

12 Department of Biomedical Sciences and Center for Reproductive Genomics, Cornell University, Ithaca,  
13 New York 14853, United States of America

14 <sup>1</sup> Current Address: Facultad de Medicina de la, Universidad Autónoma de San Luis Potosí, San Luis  
15 Potosí, México

16 <sup>2</sup> Corresponding authors: [mab587@cornell.edu](mailto:mab587@cornell.edu) and [paula.cohen@cornell.edu](mailto:paula.cohen@cornell.edu)

17  
18  
19  
20  
21 Research reported in this publication was supported in part by the Eunice Kennedy Shriver National Institute of Child Health & Human  
22 Development of the National Institutes of Health under Award Number K99HD090289 to M.A.B-E. A seed grant from the Cornell Center for  
23 Reproductive Genomics to M.A.B-E, using funds obtained as part of the NICHD National Centers for Translational Research in Reproduction  
24 and Infertility (NCTRI), award number P50HD076210 to P.E.C. and Empire State Stem Cell Fund through New York State Department of  
25 Health Contract # C30293GG. Imaging data was acquired through the Cornell University Biotechnology Resource Center, with NSF funding  
26 #1428922 for the shared Zeiss Elyra Microscope. NIH SIG 1S10 OD017992-01 grant support the Orbitrap Fusion mass spectrometer. The  
27 funders had no role in study design, data collection and analysis, decision to publish, or preparation of the manuscript.

28

29 **Abstract**

30 Telomeres are dynamic nucleoprotein structures capping the physical ends of linear eukaryotic  
31 chromosomes. They consist of telomeric DNA repeats (TTAGGG), the shelterin protein complex, and  
32 Telomeric Repeat-Containing RNA (TERRA). Proposed TERRA functions are wide-ranging and include  
33 telomere maintenance, telomerase inhibition, genomic stability, and alternative lengthening of telomere.  
34 However, the role of TERRA in primordial germ cells (PGCs), the embryonic precursors of germ cells,  
35 is unknown. Using RNA-fluorescence in situ hybridization (RNA-FISH) we identify TERRA in PGCs  
36 soon after these cells have migrated to, and become established in, the developing gonad. RNA-FISH  
37 showed the presence of TERRA transcripts in female PGCs at 11.5, 12.5 and 13.5 days post-coitum. In  
38 male PGCs, however, TERRA transcripts are observable from 12.5 dpc. Using qPCR we evaluated  
39 chromosome-specific TERRA expression, and demonstrated that TERRA levels vary with sex and  
40 gestational age, and that transcription of TERRA from specific chromosomes is sexually dimorphic.  
41 TERRA interacting proteins were evaluated using Identification of Direct RNA Interacting Proteins  
42 (iDRiP) which identified 48 in female and 26 in male protein interactors specifically within nuclear  
43 extracts from PGCs at 13.5 dpc. We validated two different proteins the splicing factor, proline- and  
44 glutamine-rich (SFPQ) in PGCs and Non-POU domain-containing octamer-binding protein (NONO) in  
45 somatic cells. Our results show that, TERRA interacting proteins are determined by sex in both PGCs  
46 and somatic cells. Taken together, our data indicate that TERRA expression and interactome during  
47 PGC development are regulated in a dynamic fashion that is dependent on gestational age and sex.

48

49

50

51

52

53

54

## 55 Introduction

56 Telomeres are dynamic nucleoprotein structures capping the physical ends of linear eukaryotic  
57 chromosomes. Telomeres protect the chromosome ends from degradation and erroneous  
58 recombination events and, as such, are essential for ensuring genome stability<sup>1</sup>. They consist of DNA,  
59 proteins and RNA. Telomeric DNA consists of double strand DNA repeats (TTAGGG) which extend 9-  
60 15 kb in length in humans but can be as long as 100 kb in rodents<sup>2-4</sup>. The protein component of the  
61 telomere is comprised of the shelterin complex, consisting of TRF1, TRF2, RAP1, TIN2, TPP1 and  
62 POT1<sup>5</sup>. The shelterin complex plays numerous roles in telomere stabilization, including suppression of  
63 the DNA damage response (DDR) and the regulation of telomerase activity<sup>6</sup>. The Telomeric RNA  
64 component is TERRA (Telomeric repeat-containing RNA) a long non-coding RNA (lncRNA)<sup>3,7-9</sup>. Long  
65 non-coding RNAs are a class of RNAs defined by their size and by their lack of a translation product<sup>10</sup>.

66 TERRA transcripts are comprised of UUAGGG repeats that are transcribed by RNA polymerase  
67 II, initiating from the subtelomeric regions of the telomeres and proceeding toward the chromosome  
68 ends<sup>5</sup>. TERRA transcription in human cells is regulated by promoters localized at all subtelomeric  
69 regions, and by methylation on the CpG islands of these promoters<sup>11,12</sup>. By contrast, in mice only one  
70 promoter has been described on chromosome 18 and its regulation does not appear to dependent on  
71 methylation<sup>13</sup>. TERRA expression levels and localization are cell cycle dependent, being high during  
72 the G1-S transition, peaking at early S phase and declining as cells transition to G2 and M phase<sup>11</sup>.  
73 TERRA was initially described to be associated exclusively with the ends of linear eukaryotic DNA but  
74 recently studies have indicated that is also associates with other regions of the genome<sup>14</sup>.

75 Several TERRA functions have been described, including telomere maintenance, telomerase  
76 inhibition, telomeric heterochromatin formation, genomic stability, an alternative lengthening  
77 mechanism for telomeres<sup>14-16</sup>, and regulation of telomerase<sup>14,17</sup>. More recently, TERRA has been  
78 implicated in the protection of telomere stability, in which TERRA competes with ATRX to bind to DNA  
79<sup>14</sup>, and in the regulation of sex chromosome pairing during stem cell X chromosome inactivation, where  
80 TERRA creates a hub to guide X inactivation center homology searching<sup>18</sup>.

81 TERRA localizes to the telomeres of mammalian germ cells (oocytes and spermatocytes) during  
82 all stages of meiotic prophase I, where it appears to be regulated in a sex-specific manner<sup>3, 19</sup>.  
83 However, the function and timing of TERRA transcription remains unclear. Preliminary data suggest  
84 that TERRA transcription initiates in the primordial germ cell stage<sup>20</sup>. Primordial Germ Cells (PGCs)  
85 are the embryonic precursors of the germ cell lineage that will form the oocytes and sperm required for  
86 sexual reproduction<sup>21, 22</sup>. In mice, PGCs first become identifiable as a cluster of approximately 40 cells  
87 at the base of the allantois at around embryonic day 6.25 days post coitum (dpc). Starting around 7.5  
88 dpc, PGCs begin their migration towards the presumptive gonad, colonizing the genital ridge by ~10.5  
89 dpc<sup>21, 23</sup>, and reaching their maximal numbers by ~13.5 dpc through continued migration and  
90 proliferation<sup>24</sup>. In the female embryo, at 13.5 dpc PGCs then enter prophase I of meiosis and arrest at  
91 diplotene by around the time of birth. Meanwhile, male PGCs at this gestational age undergo mitotic  
92 arrest in the G<sub>0</sub>/G<sub>1</sub> phase and stay quiescent for the remainder of the embryonic period, only initiating  
93 meiosis after birth<sup>21</sup>.

94 In the current study, we have investigated the localization, transcription, and protein interactions  
95 of TERRA in male and female PGCs just after sex determination, and prior to the time that female germ  
96 cells enter meiosis and male germ cells become quiescent. Our results demonstrate key differences in  
97 the expression of TERRA and the localization of TERRA between male and female PGCs and across  
98 gestational age. Importantly, we also observe sex and age-dependent variations in the proteins with  
99 which TERRA interacts. Our results demonstrate that TERRA expression, localization and interactome  
100 in PGCs are sexually dimorphic and dependent on developmental age, suggesting that TERRA  
101 regulation may be an important component of the sex-specific development of the mammalian germ  
102 line.

103

104

105

106

107 **Materials and Methods**

108 *Mouse Handling and Care*

109 All mouse studies were conducted with the prior approval of the Cornell Institutional Animal Care and  
110 Use Committee. 6 to 8 week old wild-type C57Bl/6J mice were mated and checked for vaginal plugs the  
111 next morning. Female mice with plugs were moved into a separate cage, and were considered to be at  
112 0.5 days post-coitum (dpc). At 11.5, 12.5 and 13.5 dpc, the mothers were sacrificed to recover gonads  
113 from fetuses for the isolation of PGCs.

114

115 *Extraction of Primordial Germ Cells*

116 PGCs were purified by magnetic cell sorting of gonads from 11.5, 12.5 and 13.5 dpc male and female  
117 embryos following a published protocol with some modifications<sup>25, 26</sup>. Briefly, the gonads from 11.5,  
118 12.5 and 13.5 dpc embryos were dissected under a stereomicroscopy in EmbryoMax M2 Medium  
119 (Merck-Millipore). Gonads at 12.5 dpc and 13.5 dpc were classified according to the anatomical  
120 characteristics. For 11.5 dpc gonads dissected and sexed by PCR following the method described by  
121 McClive, P.J. & Sinclair<sup>27</sup>. Testis and ovaries were disaggregated in 0.25% trypsin-EDTA containing  
122 20 µg/ml DNase (Sigma-Aldrich, St. Louis, MO. USA) at RT. The enzymatic reaction was stopped by  
123 adding M2 medium with 10% FCS (Gibco, Thermo Fisher, Waltham, MA. USA). The cells were  
124 centrifuged at 3220 rcf for 2 min and washed twice with 500 µl of M2 medium containing 10% FCS and  
125 20 µg/ml DNase. The cell pellet was resuspended in 400 µl of M2 medium, mixed with 30 µl anti-SSEA-  
126 1 (CD15) MicroBeads (Miltenyi Biotech, Bergisch Gladbach, Germany) and incubated for 45 min at  
127 4°C. PGCs were isolated from somatic cells with a miniMACs column following the manufacturer's  
128 instructions and counted (Miltenyi Biotech, Bergisch Gladbach. Germany). The purity of PGCs was  
129 verified by, counting cells that stained positive for alkaline phosphatase with the naphthol AS-MX/ FAST-  
130 RED procedure (Sigma-Aldrich, St. Louis, MO. USA). In all cases the purity of the PGCs was evaluated  
131 from cell counts in 4 different fields of the microscope until a total number of 100 cells were recorded.  
132 The purity of PGCs varies according to gestational age: at 11.5 dpc, cell suspensions showed a purity

133 of 80-85%, at 12.5 dpc the purity of PGCs ranged from 85 to 89%, and at 13.5 dpc PGC there was a  
134 recorded 90–95% purity. Typical yield of PGCs per embryo varies by gestational age. At 11.5 dpc the  
135 total isolated PGCs was approximately 800, at 12.5 dpc there were approximately 4000 PGCs isolated  
136 per embryo and approximately 10000 PGCs per embryo at 13.5 dpc. The somatic cells that were  
137 separated in the MS column were also collected for analysis.

138

### 139 *Primordial germ cell (PGCs) and somatic cell spreading (Soma)*

140 After extraction, 20  $\mu$ l of the cell suspension was placed on poly-L-lysine slides that were previously  
141 cleaned with RNaseZap (Thermo Fisher, Waltham, MA USA). Cells were permeabilized by incubation  
142 for 10 minutes in CSK buffer (100 mM NaCl, 300 mM sucrose, 3 mM MgCl<sub>2</sub>, 10 mM PIPES (Sigma-  
143 Aldrich, St. Louis, MO. USA), 0.5% Triton X-100 (Fisher Scientific, Pittsburgh, PA. USA) and 10 mM  
144 ribonucleoside-vanadyl complex (New England Biolabs, Ipswich, Massachusetts. USA))<sup>28</sup>. Cells were  
145 fixed in 4% paraformaldehyde (Electron Microscopy Sciences, Hatfield, PA. USA) for 10 min and then  
146 washed in 70% ethanol. Slides were stored at -80°C until use.

147

### 148 *Immunofluorescence*

149 Immunofluorescence (IF) was performed as previously described with modifications<sup>28</sup>. Slides were  
150 blocked 10 min with PTBG (1x PBS, 0.1% Tween-20, 0.2% BSA, 0.2% gelatin) and then incubated  
151 overnight at 4°C with mouse anti-*Tert* (dilution 1:100 from Rockland antibodies #600-401-252S), anti-  
152 NONO (dilution 1:100 from Proteintech #11058), anti-SFPQ (dilution 1:100 from ProteinTech #15585)  
153 and anti-VASA (DDX4) (dilution 1:200 from Abcam #ab13840) in PTBG. Slides were washed three  
154 times for 5 minutes in PBST (0.1% Tween-20 in 1x PBS) before incubation at 37°C for 40 minutes with  
155 the following secondary antibody: Alexa Fluor 488-AffiniPure F(ab')<sub>2</sub> Fragment goat anti-mouse IgG  
156 (H+L), Alexa Fluor 488-AffiniPure F(ab')<sub>2</sub> Fragment goat anti-rabbit IgG (H+L) and Alexa Fluor 594-  
157 AffiniPure F(ab')<sub>2</sub> Fragment goat anti-rabbit IgG (H+L), all of them from Jackson Immunoresearch  
158 (West Grove, PA. USA). Secondary antibodies were incubated at concentrations of 1:1000 in PTBG at

159 37°C for 60 minutes. Slides were washed three times in PBST, fixed 10 min in 4% paraformaldehyde in  
160 1x PBS (pH 7), and rinsed with 1x PBS. At the end of the IF procedure, RNA-FISH was performed.

161

### 162 *RNA-Fluorescence In Situ Hybridization*

163 TERRA focus detection was performed by RNA-FISH<sup>28, 29</sup>. RNA-fluorescence in situ hybridization  
164 (RNA-FISH) was performed immediately after IF. Briefly, after dehydration through a ice cold graded  
165 ethanol series (70%, 80%, 90% and 100%, during 5min each), cells were hybridized overnight at 37°C  
166 with a 25 nM (CCCTAA)<sup>3</sup> oligonucleotide probe conjugated with Cy3 (Integrated DNA Technologies  
167 IDT, Coralville, IO. USA) in hybridization buffer (10% of 20x SSC (Sigma-Aldrich, St. Louis, MO. USA),  
168 20% 10 mg/ml BSA (Sigma-Aldrich, St. Louis, MO. USA), 20% of 50% dextran sulfate (Fisher Scientific,  
169 Pittsburgh, PA. USA), and 5% deionized formamide (Fisher Scientific, Pittsburgh, PA. USA). Next,  
170 slides were washed with 50% formamide/1xSSC during 5 min followed by two washes of 2xSSC at  
171 39°C. Finally, cell nuclei were counterstained with 4,6-diamidino-2-phenylindole (DAPI) diluted in  
172 Vectashield (Vector Laboratories, Burlingame, CA). For each sample, a negative control was included,  
173 consisting of slides treated 10 min with RNase A (Sigma-Aldrich, St. Louis, MO. USA) at a  
174 concentration of 100 µg/ml prior to RNA-FISH performance. Foci were counted as signals that  
175 appeared as discrete dots or signals within the cell. At least 75 cells were counted per each PGC pool  
176 and 50 for each somatic cells pool.

177

### 178 *Immunohistochemistry*

179 Immunohistochemistry was performed on paraffin-embedded sections from 13.5 dpc ovaries and testis.  
180 Slides were deparaffinized and rehydrated with 3 washes of Safeclear (Fisher Scientific, Pittsburgh, PA.  
181 USA) for 5 minutes each, followed by 3 washes of each concentration in a graded series of ethanol  
182 (100%, 95%, 80%, 70%). After rinsing the slides 2 times for 5 minutes in distilled water, the slides were  
183 incubated in sodium citrate pH 6.0 during 40 min at 95 °C. Permeabilization was performed in 0.2% of  
184 Triton-X 100 in PBS for 30 min. Section were blocked for 4 h in blocking solution (2.52 mg/ml glycine,

185 10% goat serum, 3% BSA in PBS-T) and then incubated with primary antibody overnight at RT. After 2  
186 washes with PBST, the slides were incubated with secondary antibodies for 2 h at RT. The slides  
187 where rinsed in PBST, cell nuclei were counterstained with 4,6-diamidino-2-phenylindole (DAPI) and  
188 mounted in Vectashield (Vector Laboratories, Burlingame, CA).

189

### 190 *Imaging*

191 Imaging of PGCs and somatic cells was performed using ELYRA 3D-Structured Illumination Super  
192 resolution Microscopy (3D-SIM) from Carl Zeiss with ZEN Black software (Carl Zeiss AG, Oberkochen.  
193 Germany). Images are show as maximum intensity projections of z-stack images- 3D-SIM. To  
194 reconstruct high-resolution images, raw images were computationally processed by ZEN Black.  
195 Channel alignment was used to correct for chromatic shift. The brightness and contrast of images were  
196 adjusted using ImageJ (National Institutes of Health, USA). Image acquisition of the tissue sections was  
197 performed using a Zeiss Imager Z1 microscope under 20X, 40X or 63X magnifying objectives, at RT.  
198 Images were processed using ZEN 2 (Carl Zeiss AG, Oberkochen. Germany).

199

### 200 *RNA isolation and reverse transcription*

201 Total RNA from each gestational age (11.5, 12.5 and 13.5 dpc for both male and female gonads) was  
202 extracted using TRIzol (Invitrogen Co, Carlsbad, CA, USA). Total RNA was re-suspended in 40 µl of  
203 RNase free water. RNA concentration was then determined spectrophotometrically using a NanoDrop  
204 2000 (Thermo Fisher, Waltham, MA. USA). 1.5µg of total RNA was reverse transcribed using and  
205 Superscript III First-Strand Synthesis System (Invitrogen Co, Carlsbad, CA, USA) using TERRA  
206 reverse primer or 1.65 µM random hexamers/1.25 µM Oligo(dt) for the housekeeping gene  
207 (Supplemental Table 1). cDNA was kept at -20°C until used in qPCR.

208

209

210



211 *qPCR analysis*

212 Real-time PCR amplification and analysis was performed following the protocol previously described  
213 by Feretzaki and Lingner<sup>30</sup>. Primers were designed to amplify the subtelomeric region of different  
214 chromosomes using the sequences previously published by Lopez de Silanes et al., 2014<sup>13</sup>  
215 (Supplemental Table 1) (Subtelomeric regions with active transcription of functional genes were not  
216 included). Gene expression was normalized to succinate dehydrogenase complex flavoprotein subunit  
217 A (SDHA) expression<sup>31</sup>. Each reaction mixture consisted of, 1 µl of cDNA, 0.5 µl of forward primer (0.2  
218 µM), 0.5 µl of reverse primer (0.2 µM), 10 µl of Roche FastStart SYBR Green Master (Sigma-Aldrich,  
219 St. Louis, MO. USA) and 7 µl of nuclease-free water. qRT-PCR amplification reaction was performed  
220 with specific primers (Supplemental Table 1). PCR conditions were the same as those used by  
221 Feretzaki and Lingner<sup>30</sup>: 30 s at 95°C, followed by 40 cycles at 95°C for 1 s and 60°C for 60 s. After  
222 PCR, melting curve analyses were performed to verify specificity and identity of the PCR products. All  
223 data were analyzed with the CFX-manager Bio-Rad (Bio-Rad Laboratories). All analyzed genes were  
224 performed in triplicate for each one of the 3 biological samples of the three different developmental  
225 ages (11.5, 12.5 and 13.5 dpc) and both sexes (female and male). qPCR data for TERRA quantification  
226 are analyzed using the relative quantification method<sup>32</sup>. This method feeds the Ct values obtained from  
227 the qPCR experiment into a series of subtractions to calculate the relative gene expression of the gene  
228 of interest (TERRA) normalized against a reference gene (SDHA) in different conditions as was  
229 described previously by<sup>14, 18, 30</sup>.

230

231 *Identification of Direct RNA Interacting Proteins (iDRiP)*

232 Proteins that directly interact with TERRA were identified through method called iDRiP, following a  
233 published protocol with some adaptations<sup>33</sup>. The original iDRiP method utilized large numbers of  
234 cultured somatic cells (around 30 million). In the current study, we adapted the conditions to reduce the  
235 input of cells around 10-fold and to use primary PGCs from 13.5 dpc male and female gonads, along  
236 with gonadal somatic cells as controls. After cell isolation, cells were rinsed with cold PBS 3 times and

237 the plated in a petri dish for 30 min at 37°C 5% CO<sub>2</sub>. Excess PBS was removed and the cells were  
238 irradiated with UV light at 200 mJ/cm<sup>2</sup> energy (Spectrolinker XL, UV crosslinker. Spectronics  
239 Corporation. Westbury, NY. USA). The cells were transferred to an eppendorf tube and spun down at  
240 1258 rcf for 5 min at 4°C. The pellet was re-suspended in 300 µl cold cytoskeleton buffer (CSKT) (0.5%  
241 Triton X-100, 0.5% PIPES, 100 mM NaCl, 3 mM MgCl<sub>2</sub>, 0.3 M sucrose and 1 mM PMSF) (all from  
242 Fisher Scientific, Pittsburgh, PA. USA) with protease inhibitor (1x Roche Protease Inhibitor Cocktail  
243 Tablets) and incubated for 10 min at 4°C on a rocker. Cells were spun down again at 453 rcf at 4°C for  
244 5 minutes, supernatant was removed and re-suspended in nuclear isolation buffer (10 mM Tris pH 7.5,  
245 10 mM KCl, 0.5% Nonidet-P 40, 1x protease inhibitors, 1 mM PMSF), before spinning again at 453 rcf  
246 at 4°C for 10 min. Supernatant was removed and the cell pellets were flash frozen in liquid nitrogen and  
247 stored at -80°C until use. Cells were pooled from number of ≈300 female and ≈300 male embryos and  
248 thawed at 37°C. 500 µl Turbo DNaseI buffer, 50 µl Turbo DNaseI enzyme (2U/µl), 10 µl superaseIN  
249 (Thermo Fisher, Waltham, MA USA) and 5 ul of 50x protease inhibitor was added to the cell  
250 suspension. Samples were incubated at 37°C for 45 min on a rocker. The nuclear lysates were further  
251 solubilized by adding 1% sodium lauryl sarcosine, 1x protease inhibitor, 0.3 M lithium chloride, 25 mM  
252 EDTA and 25 mM EGTA to final concentrations (all of them from Sigma-Aldrich, St. Louis, MO. USA).  
253 Samples were mixed well and incubated again at 37°C for 15 min. As a positive control, the highly  
254 expressed RNA U6 was used, and RNase A treated samples as a negative control. U6 and TERRA-  
255 specific biotinylated probes (Integrated DNA Technologies IDT, Coralville, IO. USA), were conjugated  
256 to streptavidin beads (MyOne streptavidin C1 Dyna beads, Invitrogen) for a 30 min incubation period at  
257 RT. The conjugated beads were mixed with the lysates and incubated at 55°C for one hour before  
258 overnight incubation at 37°C in a hybridization chamber. After incubation, the beads were washed three  
259 times in wash buffer (10 mM Tris, pH 7.5, 0.3 M LiCl, 1% LDS, 0.5% Nonidet-P 40, 1x protease  
260 inhibitor) at RT then treated with DNase I digestion buffer, Turbo DNase I, 0.3 M LiCl, protease  
261 inhibitors, and SuperaseIN (Thermo Fisher, Waltham, MA USA) at 37°C for 20 min. Beads were re-

262 suspended and washed two more times in the wash buffer. For mass spectrometry analysis, proteins  
263 were eluted in Elution Buffer (10 mM Tris, pH 7.5, 1 mM EDTA) at 70°C for 4 min.

264 *Nano-scale reverse phase chromatography and tandem MS (nanoLC-MS/MS)*

265 Mass spectrometry of iDRiP-derived proteins was performed in the Cornell University Proteomics and  
266 Mass Spectrometry facility. The nanoLC-MS/MS analysis was carried out using an Orbitrap Fusion  
267 (Thermo-Fisher Scientific, San Jose, CA) mass spectrometer equipped with a nanospray Flex Ion  
268 Source using high energy collision dissociation (HCD) and coupled with the UltiMate3000 RSLCnano  
269 (Dionex, Sunnyvale, CA). Each reconstituted samples for both PGC and SOMA (18 ul) was injected  
270 onto a PepMap C-18 RP nano trap column (3  $\mu$ m, 100  $\mu$ m  $\times$  20 mm, Dionex) with nanoViper Fittings at  
271 20  $\mu$ L/min flow rate for on-line desalting and then separated on a PepMap C-18 RP nano column (3  
272  $\mu$ m, 75  $\mu$ m  $\times$  25 cm), and eluted in a 120 min gradient of 5% to 35% acetonitrile (ACN) in 0.1% formic  
273 acid at 300 nL/min. The instrument was operated in data-dependent acquisition (DDA) mode using FT  
274 mass analyzer for one survey MS scan for selecting precursor ions followed by 3 second “Top Speed”  
275 data-dependent HCD-MS/MS scans in Orbitrap analyzer for precursor peptides with 2-7 charged ions  
276 above a threshold ion count of 10,000 with normalized collision energy of 38.5%. For label-free protein  
277 analysis, one MS survey scan was followed by 3 second “Top Speed” data-dependent CID ion trap  
278 MS/MS scans with normalized collision energy of 30%. Dynamic exclusion parameters were set at 1  
279 within 45s exclusion duration with  $\pm$ 10 ppm exclusion mass width. Two samples from each group PGC  
280 and SOMA were analyzed in Orbitrap in the order of female followed by male samples for data  
281 acquisition. All data are acquired under Xcalibur 3.0 operation software and Orbitrap Fusion Tune 2.0  
282 (Thermo-Fisher Scientific).

283

284 *NanoLC-MS/MS data processing, protein identification and data analysis*

285 All MS and MS/MS raw spectra from each experiment were processed and searched using the Sequest  
286 HT search engine within the Proteome Discoverer 2.2 (PD2.2, Thermo). The default search settings

287 used for relative protein quantitation and protein identification in PD2.2 searching software were: two  
288 mis-cleavage for full trypsin with fixed carbamidomethyl modification of cysteine and oxidation of  
289 methionine and demamidation of asparagine and glutamine and acetylation on N-terminal of protein were  
290 used as variable modifications. Identified peptides were filtered for maximum 1% false discovery rate  
291 (FDR) using the Percolator algorithm in PD 2.2. The relative label free quantification method within  
292 Proteome Discoverer 2.2 software was used to calculate the protein abundances. The intensity values  
293 of peptides, which were summed from the intensities values of the number of peptide spectrum  
294 matches (PSMs), were summed to represent the abundance of the proteins. For relative ratio between  
295 the two groups, here PGC female/male and Soma female/male, no normalization on total peptide  
296 amount for each sample was applied. Protein ratios are calculated based on pairwise ratio, where the  
297 median of all possible pairwise ratios calculated between replicates of all connected peptides.

298

### 299 *Statistical Analysis*

300 Statistical analyses were performed using GraphPad Prism version 6.00 for Macintosh (GraphPad  
301 Software, San Diego California USA, [www.graphpad.com](http://www.graphpad.com)). Specific analyses are described within the  
302 text and the corresponding figures. Alpha value was established at 0.05.

303

## 304 **Results**

### 305 **Developmental changes in TERRA localization are different in male and female PGCs**

306 Using RNA-FISH and 3D-SIM microscopy, we evaluated the presence of TERRA at three  
307 developmental stages (11.5 12.5 and 13.5 dpc) in both sexes. The selection of these stages was based  
308 on the timing of sex determination in the mouse, the methylation status of PGCs, and the entrance into  
309 meiosis of female PGCs after 13.5 dpc<sup>21</sup>. Quantitation of TERRA focus numbers was performed in  
310 both male and female SSEA-1 positive PGCs as well as in SSEA-1 negative cells (somatic cells). As a  
311 negative control, cells treated with RNase A were used in which TERRA RNA should be completely  
312 degraded. A total number of 1352 PGCs and 973 somatic cells were analyzed. Female and male

313 PGCs, and somatic cells were obtained from at least 3 different pools at the different gestational ages.  
314 Pools consisted of PGCs from between 20 and 40 gonad pairs (1 pair per embryo).  
315 Analysis of female PGCs and somatic cells showed the presence of discrete foci of TERRA (Fig. 1A  
316 and 1B). The mean focus number observed in 11.5 dpc female PGCs was  $0.76 \pm 0.37$  per cell, rising to  
317  $3.88 \pm 0.73$  at 12.5 dpc, and  $8.76 \pm 4.03$  at 13.5 dpc. Statistical analysis revealed significant differences  
318 among the three gestational ages ( $p=0.001$  ANOVA; Fig. 1B). Meanwhile, TERRA focus counts from  
319 female gonadal somatic cells at the same gestational ages revealed no statistical differences from 11.5  
320 dpc ( $19.76 \pm 1.143$ ), 12.5 dpc ( $19.86 \pm 1.52$ ), and 13.5 dpc ( $19.78 \pm 1.44$ ; Fig. 1C and 1D). The number  
321 of TERRA foci in somatic cells was considerably higher than that observed in the neighboring germ  
322 cells at each gestational age. These results indicate that TERRA focus numbers alter with gestational in  
323 female PGCs but not in neighboring somatic cells.

324 In male PGCs, the dynamics of TERRA focus accumulation were very different to that seen in females.  
325 We were not able to detect TERRA signal in male 11.5 dpc PGCs. Instead, the earliest detection  
326 TERRA in male PGCs was at 12.5 dpc where we observed cells with either zero or one TERRA focus  
327 ( $0.73 \pm 0.45$  foci/cell). A statistically significant increase in the TERRA foci was observed in male 13.5  
328 dpc PGCs, where the mean focus number rose to  $4.03 \pm .82$  ( $p=0.001$ ; Fig. 1A). Adjacent somatic cells  
329 of the male gonad showed TERRA focus numbers that were indistinguishable at all ages from that of  
330 female gonads, with no statistically significant differences found between sex or gestational age (11.5  
331 dpc:  $19.66 \pm 1.02$  foci/cell, 12.5 dpc:  $20.05 \pm 1.71$  foci/cell, and 13.5 dpc:  $19.35 \pm 1.76$  foci/per cell; Fig.  
332 1D). These results indicate that in male PGCs, like in female PGCs, the gestational age is a key factor  
333 in TERRA localization in PGCs but not in somatic cells.

334 Comparison of TERRA foci numbers in both female PGCs and male PGCs revealed a sex bias.  
335 Compared to male PGCs, female PGCs showed significantly more TERRA foci at all the stages of  
336 development ( $p=0.001$ ; Fig. 1B), while no differences were observed at any gestational age between  
337 male and female somatic cells (Fig. 1D).

338

### 339 **Differential transcription of TERRA in male and female PGCs**

340 In human cell lines, transcription of TERRA is regulated by chromosome specific promoters that are  
341 repressed by CpG methylation<sup>34, 35</sup>. However, previous reports in mouse cell lines showed that almost  
342 all the TERRA transcripts are transcribed from the subtelomeric region of chromosome 18, with some  
343 minor contribution from chromosome 9<sup>13</sup>. However, nothing is known about TERRA transcription  
344 during this unique period of PGC development in which distinct changes in DNA methylation are  
345 occurring. Thus, we hypothesized that the loss of methylation that is a unique feature of PGCs may  
346 result in increased TERRA transcription, resulting in the increased localization of TERRA that we  
347 observed through this gestational time span. We performed qPCR in isolated female and male PGCs at  
348 11.5, 12.5 and 13.5 dpc using the subtelomeric sequences of each chromosome previously published  
349 by Lopez de Silanes et al., 2014<sup>13</sup> (Supplemental Table 1). As expected from the localization of  
350 TERRA, our results showed higher levels of TERRA expression in female PGCs compared to male  
351 PGCs at each gestational age (Fig. 2A-2O). Furthermore, and in contrast to previous results, we  
352 observed that TERRA is transcribed from multiple telomeres in a gestational and sex-dependent  
353 manner, though not all telomeres were found to be transcriptionally active (only those with any  
354 expression of TERRA are shown in Figure 2).

355 Female PGCs showed TERRA expression at 11.5 dpc from 8 different chromosome subtelomeric  
356 regions (Chromosomes 1, 2, 7,9, 11,13, 17 and 18; Fig. 2A, 2B, 2E, 2G, 2I, 2J, 2L and 2M,  
357 respectively), while in male PGCs at the same age, TERRA expression was confined to the  
358 chromosome 17 subtelomeric region (Figure 2L). At 12.5 dpc, we detected increased expression from  
359 chromosomes 5, 6, 8, 10, 15, 19 in both female and male PGCs (Fig. 2C, 2D, 2F, 2H, 2K and 2N,  
360 respectively). The exception was the subtelomeric region of chromosome X, from which transcription of  
361 TERRA was only detected for female PGCs (Fig. 2O). Transcription of TERRA from the single X  
362 chromosome of male PGCs only became evident at 13.5 dpc, but at a very low level compared to that  
363 of female PGCs at this gestational age (Fig, 2O). Most TERRA transcription in 13.5 dpc male PGCs  
364 arose from chromosomes 2 and 6, and only in the case of the latter was there higher transcription in

365 male PGCs than female PGCs (Fig. 2B, 2D). Indeed, at all gestational ages, we observed higher  
366 transcription of TERRA at each telomere in female PGCs, except for the subtelomeric region of  
367 chromosomes 2, 6 and 10. These results indicate that the transcription of TERRA is differentially  
368 regulated in the male and female germ line, and that transcription of TERRA in male PGCs is  
369 developmentally delayed compared to that in female PGCs. Moreover, our results demonstrate that  
370 TERRA is transcribed from multiple subtelomeric regions in mouse PGCs.

371

372 **TERRA and the catalytic subunit of the enzyme telomerase (TERT) colocalization and**  
373 **expression are regulated by gestational age and sex**

374 There is a lot of controversy regarding the role of TERRA in the regulation of Telomerase (TERT). The  
375 most common idea suggests that TERRA expression down-regulates or inhibits the catalytic subunit of  
376 the TERT<sup>17,36</sup>. Previous reports have indicated that there is decay in the *Tert* expression with age in  
377 male germ cells, including PGCs<sup>37,38</sup>. Confounding this, however, are the suggestions that high levels  
378 of telomerase are required to maintain spermatogonia in their undifferentiated state<sup>39</sup>. Using SIM  
379 microscopy we evaluated the colocalization of TERT and TERRA at 13.5 dpc, and plotted the percent  
380 colocalization in PGCs from both sexes (percentages were obtained from the number of TERRA-TERT  
381 foci divided by the total TERRA foci, and multiplied by 100) (Fig. 3A and 3B). In female PGCs, 63.5% of  
382 the TERRA foci colocalized with TERT but only the 36.1% in 13.5 male PGCs (Fig. 3C; p=0.0001).

383 We evaluated the expression of *Tert* using qPCR, and showed a statistically significant decrease of  
384 *Tert* expression 11.5 dpc to 13.5 dpc in both male and female PGCs (Fig. 3D; p=0.001). Consistently,  
385 however, *Tert* expression was significantly higher in male PGCs than in age-matched female PGCs  
386 (Fig. 3D). Thus, the increasing TERRA focus count with gestational age, and the relatively increased  
387 number of TERRA foci/cell in female germ cells compared to male germ cells are both inversely  
388 correlated with *Tert* expression, which declines with gestational age and which is higher in male PGCs.

389

390

391 **The TERRA interactome is sexually dimorphic**

392 To understand TERRA function, it is important to identify key TERRA interacting proteins in the cell  
393 type of interest. Given that we obtain so few PGCs at specific developmental ages, we focused on only  
394 one gestational age in which to investigate the TERRA interactome in PGCs and somatics cells: 13.5  
395 dpc. We performed iDRiP (Identification of Direct RNA Interacting Proteins), using three million PGCs  
396 from both male and female gonads, along with comparable neighboring somatic cells. A total of 48  
397 proteins were identified in female PGCs and 26 in male PGCs, of which 32 (55.2%) were unique to  
398 female PGCs and 10 (17.2%) were specific for male PGCs (Fig. 4A and 4B). The remaining 16 (27.6%)  
399 TERRA-associated proteins were shared between female and male PGCs (Fig. 4A). Using the relative  
400 label free quantification method within Proteome Discoverer 2.2 software, we calculated the protein  
401 abundances. The intensity values of peptides, which were summed from the intensities values of the  
402 number of peptide spectrum matches (PSMs), were summed to represent the abundance of the  
403 proteins. The results of these relative label free quantitations showed different relative levels of protein  
404 between female and male PGCs (Fig. 4B) (Supplemental Table 2).

405 In somatic cells, we observe far higher numbers of TERRA interacting proteins, but with greater number  
406 of proteins in male somatic cells than in female somatic cells (Fig. 4C). 118 proteins were obtained from  
407 female somatic cells and 158 were obtained from male somatic cells (Fig. 4C), with 31 (16.4%) and 71  
408 (37.6%) proteins, respectively, being unique to one sex. Overall, female and male somatic cells shared  
409 87 (46%) TERRA interacting proteins (Fig. 4D). Similar to PGCs, we used the relative label free  
410 quantification method to compare the relative abundance of proteins in both female and male somatic  
411 cells. Our results showed a different distribution of the relative protein abundance in female gonads  
412 compared to male gonads (Fig. 4D, and Supplemental Table 3).

413

414 **SFPQ interacts with TERRA in PGCs**

415 To validate the interactions of TERRA we used two different approaches. First, we immunolocalized the  
416 protein of interest on 13.5 dpc ovaries and testis, and secondly, we co-localized TERRA and the protein



417 on isolated cells. Based on our iDRIP-identified interacting proteins, we decided to analyze proteins  
418 with the most extreme ratios between male and female. After antibody testing and standardization, we  
419 selected two proteins for validation one for PGCs and another for somatic cells. The splicing factor,  
420 proline- and glutamine-rich (SFPQ) showed one of the lowest male/female ratios (0.01) (Supplemental  
421 Table 3). Using antibodies against the germ cell lineage marker VASA (DDX4/MVH) and SFPQ, we first  
422 determined the specific localization to the nucleus in both female and male PGCs by  
423 immunofluorescence on tissue sections (Fig. 5A and B). We observed the presence of SFPQ signal on  
424 the nuclei of the VASA positive cells (PGCs), but not in the VASA negative cells (somatic cells).  
425 Thereafter, we performed IF followed by TERRA RNA-FISH to evaluate the colocalization of SFPQ  
426 and TERRA on isolated female and male 13.5 dpc PGCs. Since the number of TERRA foci varies  
427 within female/male, we compared the percentages of colocalizing foci between male and female PGCs.  
428 Percentages were obtained from the number of TERRA-SFPQ foci divided by the total TERRA foci, and  
429 multiplied by 100). Interestingly, we observed colocalization in both female and male PGCs (Fig. 5C).  
430 However, female PGCs showed increased percentage of colocalization of TERRA-SFPQ (36%)  
431 compared to male PGCs (30%) (Fig. 5D;  $p=0.01$ ), indicating although TERRA interacts with SFPQ in  
432 both sexes, there is an increased interaction in female PGCs

#### 433 434 **NONO interacts with TERRA in somatic cells of the fetal gonad**

435 Similar to our approach for SFPQ, above, we selected one TERRA-interacting protein to validate on  
436 somatic cells. We analyzed the localization and interaction of TERRA with Non-POU domain-containing  
437 octamer-binding protein (NONO). First, we evaluated the localization of NONO in female and male  
438 gonads, the use of VASA antibody allowed us to identify PGCs from somatic cells. In both sexes, we  
439 observed a positive NONO staining in somatic cells with a clear absence of NONO staining on the  
440 nuclei of the VASA positive cells (Fig. 6A and 6B). Using IF followed by TERRA RNA-FISH we  
441 evaluated the colocalization of NONO with TERRA on isolated somatic cells (Fig. 5C). Colocalization  
442 analysis showed that the 42% of the TERRA foci colocalized with NONO on 13.5 female somatic cells,

443 however on the male somatic only the 25% of the TERRA foci colocalized with NONO (percentages  
444 were obtained from the number of TERRA-NONO foci divided by the total TERRA foci, and multiplied  
445 by 100) (Fig. 5 C and D;  $p=0.01$ ). These results indicate that the colocalization TERRA and NONO is  
446 restricted to the somatic cell lineages of the fetal gonad.

447

## 448 **Discussion**

449 To date, there is a very limited understanding of the function of TERRA, especially as it pertains to  
450 germ cells. Herein, we describe for first time the localization, expression and the protein interactions of  
451 TERRA in PGCs during the critical period of epigenetic reprogramming and the onset of sex  
452 determination. TERRA transcription, at least in human cells, was described to be regulated by  
453 methylation status<sup>15, 40</sup>. During PGC development, genome-wide DNA demethylation in mid-gestation  
454 results in the lowest levels of methylated DNA at around 13 dpc<sup>21, 41</sup>. Therefore, we hypothesized that  
455 the transcription and localization of TERRA within primordial germ cells will increase inversely to the  
456 drop in DNA methylation. At the same time, this period is associated with gonadal sex determination  
457 and the concomitant entry of female PGCs into meiosis, with male PGCs entering a period of mitotic  
458 quiescence. Thus, we suggest that this period of development would provide for key differences in  
459 TERRA regulation between the male and female germ lineages. Our results showed that both TERRA  
460 focus distribution and TERRA transcription increases with gestational age in both female and male  
461 PGCs. However, the increases are significantly higher in PGCs isolated from ovaries compared to  
462 those obtained from testis, and there is a delay by one day in the onset of TERRA transcription in  
463 males.

464 Sexual dimorphism in the epigenetic marker and DNA methylation patterns in PGCs has been  
465 extensively studied at different stages of gestation in the mouse<sup>21, 22</sup>. In both sexes, the lowest levels of  
466 genome-wide methylation are observed at 13.5 dpc, but the recovery of the epigenetic marks takes  
467 longer in the female germ line compared to male<sup>42</sup>. Concomitant with the return of epigenetic marks in  
468 female PGCs is their synchronous entry into the meiotic program. Thus, the increased TERRA

469 localization may be highly influenced by the onset of prophase I in the female germ line but we cannot  
470 discard the role of the changes in methylation status. Indeed, since one proposed function of TERRA is  
471 to regulate/suppress DNA damage repair processes, and since prophase I is characterized by the  
472 induction and orchestrated repair of hundreds of DNA double strand breaks (DSBs), it is tempting to  
473 speculate that one role of TERRA is to prevent DSB induction/repair at telomeres and instead to direct  
474 DSB events to more proximal chromosomal locations. The purpose of prophase I DSB induction/repair  
475 is to generate a highly regulated number of crossovers that serve as tethering points to maintain  
476 homologous chromosome interactions until the first meiotic division. Thus the placement of DSB events  
477 at telomeres would not be ideal for this purpose.

478 Interestingly, TERRA focus numbers in both male and female PGCs are significantly lower than in  
479 somatic cells, and represent a frequency that is less than a quarter of the number of telomeres present  
480 in the nucleus. In the soma, by contrast, only half the diploid number of chromosomes (40 in mouse)  
481 appear to be associated with a TERRA focus. It is important to note that somatic cells of the gonad do  
482 not undergo to epigenetic mark erasure, indicating that TERRA transcription in PGCs and somatic cells  
483 at these particular stages of development is likely to be regulated by different mechanisms.

484 Controversial results have been published about the expression of TERRA and *Tert*, where it has been  
485 described that TERRA either recruits *Tert* to the telomere to promote its enzymatic function, or  
486 conversely TERRA is acting as a competitive inhibitor that is competing for access to telomeric DNA<sup>17</sup>,  
487 <sup>36</sup>. Our results showed that in PGCs the expression of TERRA and *Tert* decreases in relation to  
488 gestational age in agreement with previous reports <sup>37, 38, 43</sup>. Our results demonstrate intermittent  
489 colocalization of TERT and TERRA, and also showed that when transcription of TERRA increases the  
490 *Tert* transcription decreases. However, more studies analyzing the interaction of TERRA with TERT are  
491 required to evaluate whether TERRA affects the enzymatic activity or the transcription of *Tert* in PGCs.

492 A previous study had investigated TERRA-protein interactions in MEFs using a pre-existing  
493 RNA-IP technique<sup>44</sup> only 41 proteins were identified as part of the TERRA interactome. Analysis of  
494 TERRA interacting proteins also has been performed using SILAC-labeled nuclear cell lysates, pooled

495 results from 2 independent pull downs showed approximately 924 interacting proteins <sup>45</sup>. More recently  
496 iDRiP was used to examine TERRA interactions in  $15 \times 10^7$  mouse embryonic stem cells and the  
497 authors report 134 interacting proteins ranging from components of the shelterin complex, to chromatin  
498 associated proteins, DNA repair proteins, and cell cycle regulators, to name just a few <sup>14, 18</sup>. In all these  
499 reports, the authors use cultured somatic cells or ESCs, allowing for high cell input ( $\approx 30$  million cells).  
500 By contrast, the current study analyzed TERRA interacting proteins starting with 3 million PGCs from  
501 each sex and an equivalent number of somatic cells, representing cell purifications from 300 pups for  
502 each sex. Despite the low input, we were able to identify 48 proteins were identified in female PGCs  
503 and 26 in male PGCs. 37.5 % of these proteins were shared with the iDRiP study of Chu *et al.* (2017)  
504 using ES cells <sup>14</sup>. These common protein interactors included several heterogeneous  
505 ribonucleoproteins, histones, chromatin associated proteins, RNAP II and DNA repair proteins, all found  
506 in PGCs and in somatic cells. Interestingly, the SFPQ-TERRA interaction that we identify in female and  
507 male PGCs was not observed in ES cells suggesting potential specificity of this interaction for germ  
508 cells. By contrast, in somatic cells of the gonad, we identified NONO as an interactor of TERRA, and  
509 this interaction was also identified in ES Cells by Chu *et al.* (2017). The comparison between our data  
510 and previous reports suggest that there are interactions conserved in different cells types, however  
511 TERRA also have specific protein interactions depending of the cell type and at least in PGCs the sex  
512 is another determinant factor.

513 To validate our iDRIP data, we chose to examine further one PGC-specific (SFPQ) and somatic  
514 cell-specific (NONO) interacting protein. We did not observe clear differences in protein localization on  
515 histology sections in 13.5 dpc ovary and 13.5 dpc testis. We analyzed the colocalization of TERRA-  
516 SFPQ and TERRA-NONO, in both cases the percentage of colocalization TERRA-Protein was higher in  
517 females compared to males, indicating that at least at this specific point of development, the  
518 interaction/function of the TERRA-Protein complex is different. SFPQ is DNA- and RNA binding protein,  
519 while NONO is an RNA splicing factor <sup>46</sup>. Both proteins have been implicated in a range of DNA/RNA  
520 metabolic processes, including ssDNA invasion to generate a D-loop, non-homologous end joining

520 (NHEJ), and mRNA processing and stabilization<sup>47</sup>. However, their function in the developing mouse  
521 gonad including meiosis, and particularly in connection with TERRA, remains unknown.

522 Taken together, herein we described for first time the presence of TERRA, in mouse primordial germ  
523 cells. Our results also showed that in mouse PGCs TERRA foci number, expression and protein  
524 interactions depend on the gestational age and sex suggesting that the role of TERRA telomere  
525 dynamics is related to sexually dimorphic changes in germ cell development with age.

526

### 527 **Competing interests**

528 The authors declare no competing interest.

529

### 530 **Author contribution**

531 M.A.B-E and P.E.C designed experiments. M.A.B-E, S.L.M and A.B-F carried out experiments. M.A.B-  
532 E, S.L.M, and P.E.C analyzed and interpreted data. M.A.B-E and P.E.C wrote the manuscript.

533

### 534 **Acknowledgements**

535 We are grateful to Dr. Jen Grenier, Dr. Rita Reig-Viader, Dr. Anand Minajigi and Dr. Jeannie Lee for  
536 their advice and protocol sharing to perform the qPCRs, RNA-FISH and iDRiP. We thank Dr. Sheng  
537 Zhang and Dr. Ruchika Bhawal from Cornell Proteomics and Mass Spectrometry Facility for his advice  
538 in development of mass spectrometry experiments. We are also thankful to Dr. Stephen Gray, Dr.  
539 Kathryn Grive, Carolyn Milano, Amanda Touey and Jeffrey Pea for providing critical feedback for the  
540 manuscript.

541

542

543

544

545 **References**

546 1. Maicher, A., Lockhart, A. & Luke, B. Breaking new ground: digging into TERRA function.

547 *Biochimica et biophysica acta* **1839**, 387-394 (2014).

548 2. Blasco, M.A. Telomeres and human disease: ageing, cancer and beyond. *Nature reviews.*

549 *Genetics* **6**, 611-622 (2005).

550 3. Reig-Viader, R., Garcia-Caldes, M. & Ruiz-Herrera, A. Telomere homeostasis in mammalian

551 germ cells: a review. *Chromosoma* **125**, 337-351 (2016).

552 4. Mason, J.M.O. & McEachern, M.J. Mild Telomere Dysfunction as a Force for Altering the

553 Adaptive Potential of Subtelomeric Genes. *Genetics* **208**, 537-548 (2018).

554 5. Schoeftner, S. & Blasco, M.A. Developmentally regulated transcription of mammalian telomeres

555 by DNA-dependent RNA polymerase II. *Nature cell biology* **10**, 228-236 (2008).

556 6. Hu, C. *et al.* Structural and functional analyses of the mammalian TIN2-TPP1-TRF2 telomeric

557 complex. *Cell research* **27**, 1485-1502 (2017).

558 7. Jain, D. & Cooper, J.P. Telomeric strategies: means to an end. *Annual review of genetics* **44**,

559 243-269 (2010).

560 8. Sfeir, A. & de Lange, T. Removal of shelterin reveals the telomere end-protection problem.

561 *Science* **336**, 593-597 (2012).

562 9. Diman, A. & Decottignies, A. Genomic origin and nuclear localization of TERRA telomeric

563 repeat-containing RNA: from Darkness to Dawn. *The FEBS journal* **285**, 1389-1398 (2018).

564 10. Kung, J.T., Colognori, D. & Lee, J.T. Long noncoding RNAs: past, present, and future. *Genetics*

565 **193**, 651-669 (2013).

566 11. Rippe, K. & Luke, B. TERRA and the state of the telomere. *Nature structural & molecular*

567 *biology* **22**, 853-858 (2015).

- 568 12. Zhang, B. *et al.* Dosage effects of cohesin regulatory factor PDS5 on mammalian development:  
569 implications for cohesinopathies. *PloS one* **4**, e5232 (2009).
- 570 13. Lopez de Silanes, I. *et al.* Identification of TERRA locus unveils a telomere protection role  
571 through association to nearly all chromosomes. *Nature communications* **5**, 4723 (2014).
- 572 14. Chu, H.P. *et al.* TERRA RNA Antagonizes ATRX and Protects Telomeres. *Cell* **170**, 86-101  
573 e116 (2017).
- 574 15. Deng, Z., Campbell, A.E. & Lieberman, P.M. TERRA, CpG methylation and telomere  
575 heterochromatin: lessons from ICF syndrome cells. *Cell cycle* **9**, 69-74 (2010).
- 576 16. Morris, K.V. & Mattick, J.S. The rise of regulatory RNA. *Nature reviews. Genetics* **15**, 423-437  
577 (2014).
- 578 17. Redon, S., Reichenbach, P. & Lingner, J. The non-coding RNA TERRA is a natural ligand and  
579 direct inhibitor of human telomerase. *Nucleic acids research* **38**, 5797-5806 (2010).
- 580 18. Chu, H.P. *et al.* PAR-TERRA directs homologous sex chromosome pairing. *Nature structural &*  
581 *molecular biology* **24**, 620-631 (2017).
- 582 19. Reig-Viader, R. *et al.* Telomeric repeat-containing RNA (TERRA) and telomerase are  
583 components of telomeres during mammalian gametogenesis. *Biology of reproduction* **90**, 103  
584 (2014).
- 585 20. Reig-Viader, R. *et al.* Telomere homeostasis is compromised in spermatocytes from patients  
586 with idiopathic infertility. *Fertility and sterility* **102**, 728-738 e721 (2014).
- 587 21. Saitou, M. & Yamaji, M. Primordial germ cells in mice. *Cold Spring Harbor perspectives in*  
588 *biology* **4** (2012).
- 589 22. Saitou, M. & Yamaji, M. Germ cell specification in mice: signaling, transcription regulation, and  
590 epigenetic consequences. *Reproduction* **139**, 931-942 (2010).
- 591 23. Saitou, M. *et al.* Specification of germ cell fate in mice. *Philosophical transactions of the Royal*  
592 *Society of London. Series B, Biological sciences* **358**, 1363-1370 (2003).

- 593 24. McLaren, A. & Lawson, K.A. How is the mouse germ-cell lineage established? *Differentiation;*  
594 *research in biological diversity* **73**, 435-437 (2005).
- 595 25. Pesce, M. & De Felici, M. Purification of mouse primordial germ cells by MiniMACS magnetic  
596 separation system. *Developmental biology* **170**, 722-725 (1995).
- 597 26. Brieño-Enriquez, M.A. *et al.* Exposure to endocrine disruptor induces transgenerational  
598 epigenetic deregulation of microRNAs in primordial germ cells. *PloS one* **10**, e0124296 (2015).
- 599 27. McClive, P.J. & Sinclair, A.H. Rapid DNA extraction and PCR-sexing of mouse embryos.  
600 *Molecular reproduction and development* **60**, 225-226 (2001).
- 601 28. Reig-Viader, R. *et al.* Telomeric repeat-containing RNA and telomerase in human fetal oocytes.  
602 *Human reproduction* **28**, 414-422 (2013).
- 603 29. Azzalin, C.M., Reichenbach, P., Khorianti, L., Giulotto, E. & Lingner, J. Telomeric repeat  
604 containing RNA and RNA surveillance factors at mammalian chromosome ends. *Science* **318**,  
605 798-801 (2007).
- 606 30. Feretzaki, M. & Lingner, J. A practical qPCR approach to detect TERRA, the elusive telomeric  
607 repeat-containing RNA. *Methods* (2016).
- 608 31. van den Bergen, J.A., Miles, D.C., Sinclair, A.H. & Western, P.S. Normalizing gene expression  
609 levels in mouse fetal germ cells. *Biology of reproduction* **81**, 362-370 (2009).
- 610 32. Livak, K.J. & Schmittgen, T.D. Analysis of relative gene expression data using real-time  
611 quantitative PCR and the 2<sup>(-T)</sup>(-Delta Delta C) method. *Methods* **25**, 402-408 (2001).
- 612 33. Minajigi, A. *et al.* Chromosomes. A comprehensive Xist interactome reveals cohesin repulsion  
613 and an RNA-directed chromosome conformation. *Science* **349** (2015).
- 614 34. Negishi, Y., Kawaji, H., Minoda, A. & Usui, K. Identification of chromatin marks at TERRA  
615 promoter and encoding region. *Biochemical and biophysical research communications* **467**,  
616 1052-1057 (2015).



- 617 35. Thijssen, P.E. *et al.* Chromatin remodeling of human subtelomeres and TERRA promoters upon  
618 cellular senescence Commonalities and differences between chromosomes. *Epigenetics* **8**, 512-  
619 521 (2013).
- 620 36. Cusanelli, E., Romero, C.A.P. & Chartrand, P. Telomeric Noncoding RNA TERRA Is Induced by  
621 Telomere Shortening to Nucleate Telomerase Molecules at Short Telomeres. *Molecular cell* **51**,  
622 780-791 (2013).
- 623 37. Dolci, S. *et al.* Stem cell factor activates telomerase in mouse mitotic spermatogonia and in  
624 primordial germ cells. *Journal of cell science* **115**, 1643-1649 (2002).
- 625 38. Coussens, M. *et al.* Regulation and effects of modulation of telomerase reverse transcriptase  
626 expression in primordial germ cells during development. *Biology of reproduction* **75**, 785-791  
627 (2006).
- 628 39. Pech, M.F. *et al.* High telomerase is a hallmark of undifferentiated spermatogonia and is  
629 required for maintenance of male germline stem cells. *Genes & development* **29**, 2420-2434  
630 (2015).
- 631 40. Nergadze, S.G. *et al.* CpG-island promoters drive transcription of human telomeres. *Rna-a*  
632 *Publication of the Rna Society* **15**, 2186-2194 (2009).
- 633 41. Guibert, S., Forne, T. & Weber, M. Global profiling of DNA methylation erasure in mouse  
634 primordial germ cells. *Genome research* **22**, 633-641 (2012).
- 635 42. Smallwood, S.A. & Kelsey, G. De novo DNA methylation: a germ cell perspective. *Trends in*  
636 *Genetics* **28**, 33-42 (2012).
- 637 43. Coussens, M. *et al.* Regulation and effects of modulation of telomerase reverse transcriptase  
638 expression in primordial germ cells during development. *Biology of reproduction* **75**, 785-791  
639 (2006).
- 640 44. de Silanes, I.L., d'Alcontres, M.S. & Blasco, M.A. TERRA transcripts are bound by a complex  
641 array of RNA-binding proteins. *Nature communications* **1** (2010).

- 642 45. Scheibe, M. *et al.* Quantitative interaction screen of telomeric repeat-containing RNA reveals  
643 novel TERRA regulators. *Genome research* **23**, 2149-2157 (2013).
- 644 46. Lee, M.W. *et al.* The structure of human SFPQ reveals a coiled-coil mediated polymer essential  
645 for functional aggregation in gene regulation. *Nucleic acids research* **43**, 3826-3840 (2015).
- 646 47. Jaafar, L., Li, Z.T., Li, S.Y. & Dynan, W.S. SFPQ center dot NONO and XLF function separately  
647 and together to promote DNA double-strand break repair via canonical nonhomologous end  
648 joining. *Nucleic acids research* **45**, 1848-1859 (2017).

649

## 650 **Figure legends**

651 **Figure 1. TERRA presence in mouse PGCs differs by sex and developmental age.** A) Super  
652 resolution imaging microscopy of TERRA RNA-FISH (red) on female and male primordial germ cells at  
653 different stages of development (11.5, 12.5 and 13.5 dpc). Control negative correspond to 13.5 dpc  
654 female and male PGCs treated with RNase before the RNA-FISH procedure. Scale bar 10  $\mu$ m; B)  
655 Quantitation of TERRA foci numbers on female and male PGCs at different stages of development  
656 (11.5, 12.5 and 13.5 dpc). Statistical analysis was performed using ANOVA followed by Kruskal-Wallis  
657 multiple comparison analysis; C) Super resolution imaging microscopy of TERRA RNA-FISH (red) on  
658 female and male somatic cells at different stages of development (11.5, 12.5 and 13.5 dpc). Negative  
659 controls used were 13.5 dpc female and male somatic cell treated with RNase before the RNA-FISH  
660 procedure. Scale bar 10  $\mu$ m; D) Quantitation of TERRA foci numbers on female and male somatic cells  
661 at different stages of development (11.5, 12.5 and 13.5 dpc). Statistical analysis was performed using  
662 ANOVA followed by Kruskal-Wallis multiple comparison analysis. p value was set at 0.05.

663

664 **Figure 2. TERRA expression is different depending on gestational age and sex.** A to O, qPCR  
665 analysis of the expression of TERRA from subtelomeric regions of chromosome 1, 2, 5, 6, 7, 8, 9, 10,  
666 11, 13, 15, 17, 18, 19 and X. The results are expressed as relative TERRA expression normalized to  
667 *Sdha* at the different developmental ages (11.5, 12.5 and 13.5 dpc). Columns in red represent female

668 PGCs and blue represent male PGCs Statistical analysis was performed using one-way ANOVA with  
669 multiple comparison. p value was set at 0.05

670

671 **Figure 3. TERRA and the catalytic subunit of the enzyme telomerase (TERT) colocalization and**  
672 **expression are regulated by gestational age and sex.** A) Super resolution imaging microscopy of  
673 TERT (green) immunofluorescence followed by TERRA RNA-FISH (red) on female 13.5 dpc PGCs.  
674 Scale bar 10  $\mu$ m; in the inset the white arrowhead shows TERRA-TERT interaction, yellow arrow head  
675 shows only TERRA foci; B) Super resolution imaging microscopy of TERT (green) immunofluorescence  
676 followed by TERRA RNA-FISH (red) on male 13.5 dpc primordial germ cells. Scale bar 10  $\mu$ m; in the  
677 inset the white arrowhead shows TERRA-TERT interaction, yellow arrow head shows only TERRA foci;  
678 C) Analysis of the percentage of TERRA-TERT colocalization on female and male PGCs. Percentages  
679 were obtained from the number of TERRA-TERT foci divided by the total TERRA foci, and multiplied by  
680 100. Statistical analysis was performed with unpaired t-test. p value was set at 0.05; D) qPCR analysis  
681 of the expression of *Tert* at different stages of development (11.5, 12.5 and 13.5 dpc). The results are  
682 expressed as the *Tert* relative expression normalized by *Sdha*. Red columns indicated the analysis  
683 performed in female PGCs and blue columns indicate the analysis performed in male PGCs. Statistical  
684 analysis was performed using one-way ANOVA with multiple comparisons. p value was set at 0.05

685

686 **Figure 4. The TERRA interactome of the gonad is sexually dimorphic.** A) Analysis of the male and  
687 female PGCs protein distribution obtained from iDRiP; B) Heat map analysis of the relative protein  
688 concentration in PGCs obtained by iDRiP-mass spec; The relative label free quantification method  
689 within Proteome Discoverer 2.2 software was used to calculate the protein abundances. C) Analysis of  
690 the male and female somatic protein distribution obtained from iDRiP; D) Heat map analysis of the  
691 relative protein concentration in somatic obtained by iDRiP-mass spec. The relative label free  
692 quantification method within Proteome Discoverer 2.2 software was used to calculate the protein  
693 abundances.

694

695 **Figure 5. SFPQ interacts TERRA on PGCs.** A) Immunofluorescence on 13.5 dpc ovary with  
696 antibodies against SFPQ (green), VASA (red) and DAPI. Scale bar 20 $\mu$ ; B) Immunofluorescence on  
697 13.5 dpc testis with antibodies against SFPQ (green), VASA (red) and DAPI. Scale bar 20  $\mu$ m; C)  
698 Super resolution imaging microscopy of SFPQ (green) immunofluorescence followed by TERRA RNA-  
699 FISH (red) on female and male 13.5 dpc primordial germ cells. Scale bar 10  $\mu$ m; in the inset the white  
700 arrowhead shows TERRA-SFPQ interaction, yellow arrow head shows only TERRA foci D) Analysis of  
701 the percentage of colocalization of TERT-TERRA on male and female PGCs. Percentages were  
702 obtained from the number of TERRA-SFPQ foci divided by the total TERRA foci, and multiplied by 100.  
703 Statistical analysis was performed using t-test analysis. p value was set at 0.05

704

705 **Figure 6. NONO interacts with TERRA on gonadal somatic cells.** A) Immunofluorescence on 13.5  
706 dpc ovary with antibodies against NONO (green), VASA (red) and DAPI. Scale bar 20  $\mu$ m; B)  
707 Immunofluorescence on 13.5 dpc testis with antibodies against NONO (green), VASA (red) and DAPI.  
708 Scale bar 20  $\mu$ m; C) Super resolution imaging microscopy of NONO (green) immunofluorescence  
709 followed by TERRA RNA-FISH (red) on female and male 13.5 dpc somatic cells. Scale bar 10 $\mu$ m; in  
710 the inset the white arrowhead shows TERRA-NONO interaction, yellow arrow head shows only TERRA  
711 foci D) Analysis of the percentage of colocalization of TERRA-NONO on male and female somatic cells.  
712 Percentages were obtained from the number of TERRA-NONO foci divided by the total TERRA foci,  
713 and multiplied by 100. Statistical analysis was performed using t-test analysis. p value was set at 0.05

714

715 **Supplementary Table 1.** TERRA and specific subtelomeric chromosome primers

716

717 **Supplementary Table 2.** PGCs protein ratios obtained from iDRiP (m/f)

718

719 **Supplementary Table 3.** Somatic cells protein ratios obtained from iDRiP (m/f)

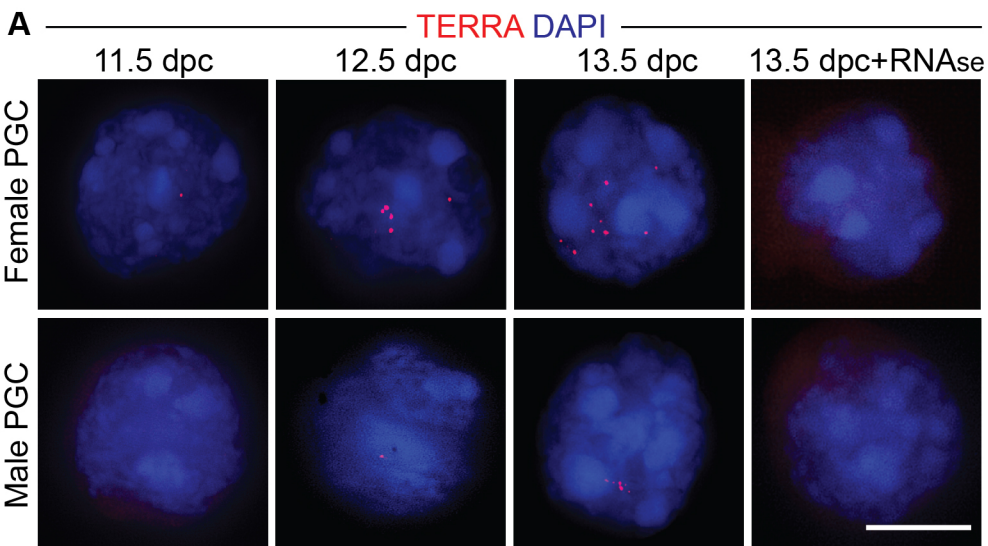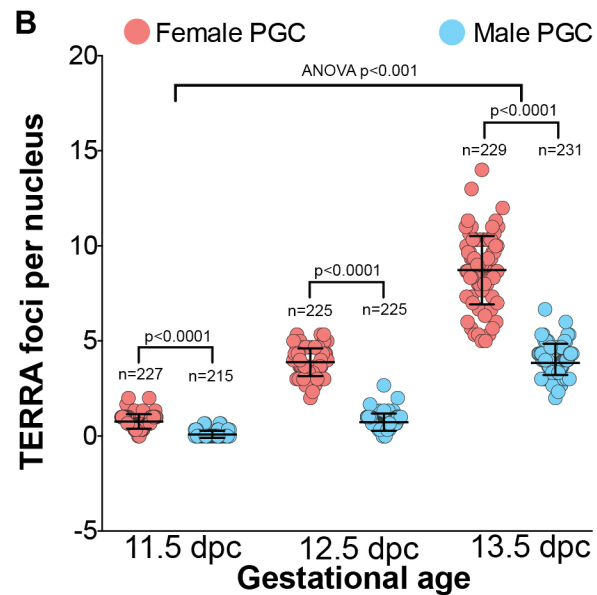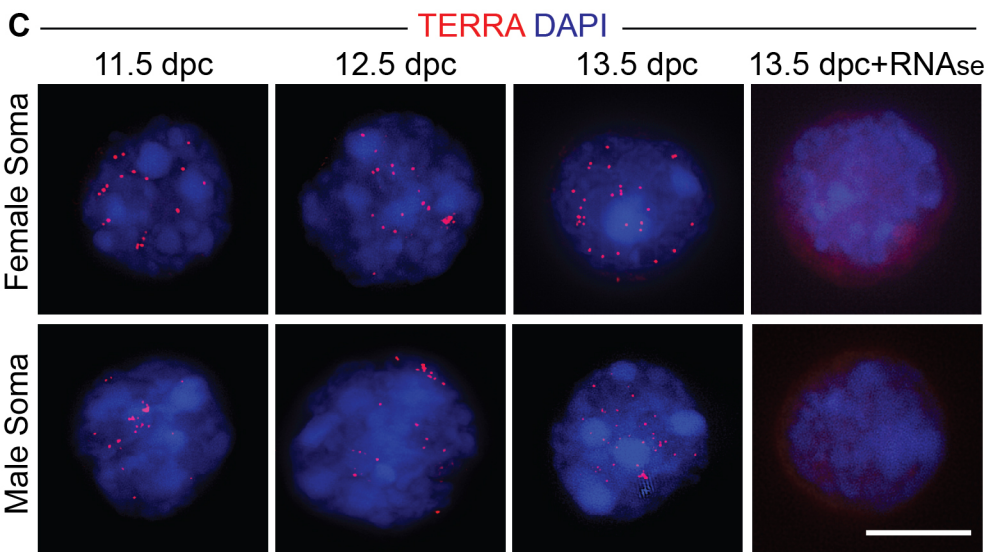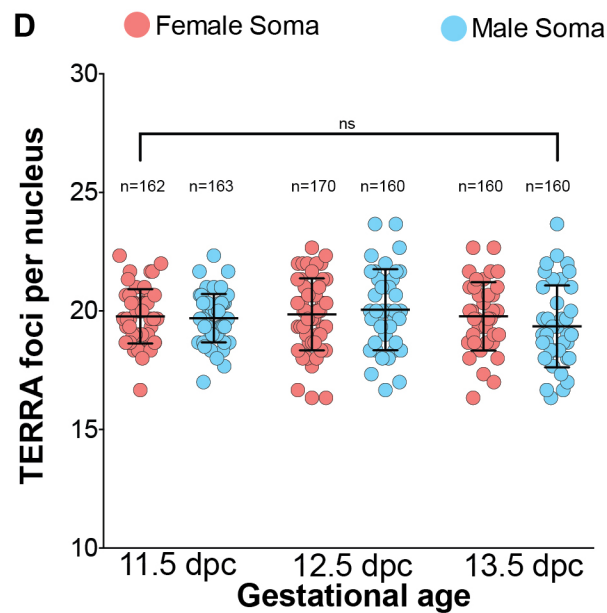

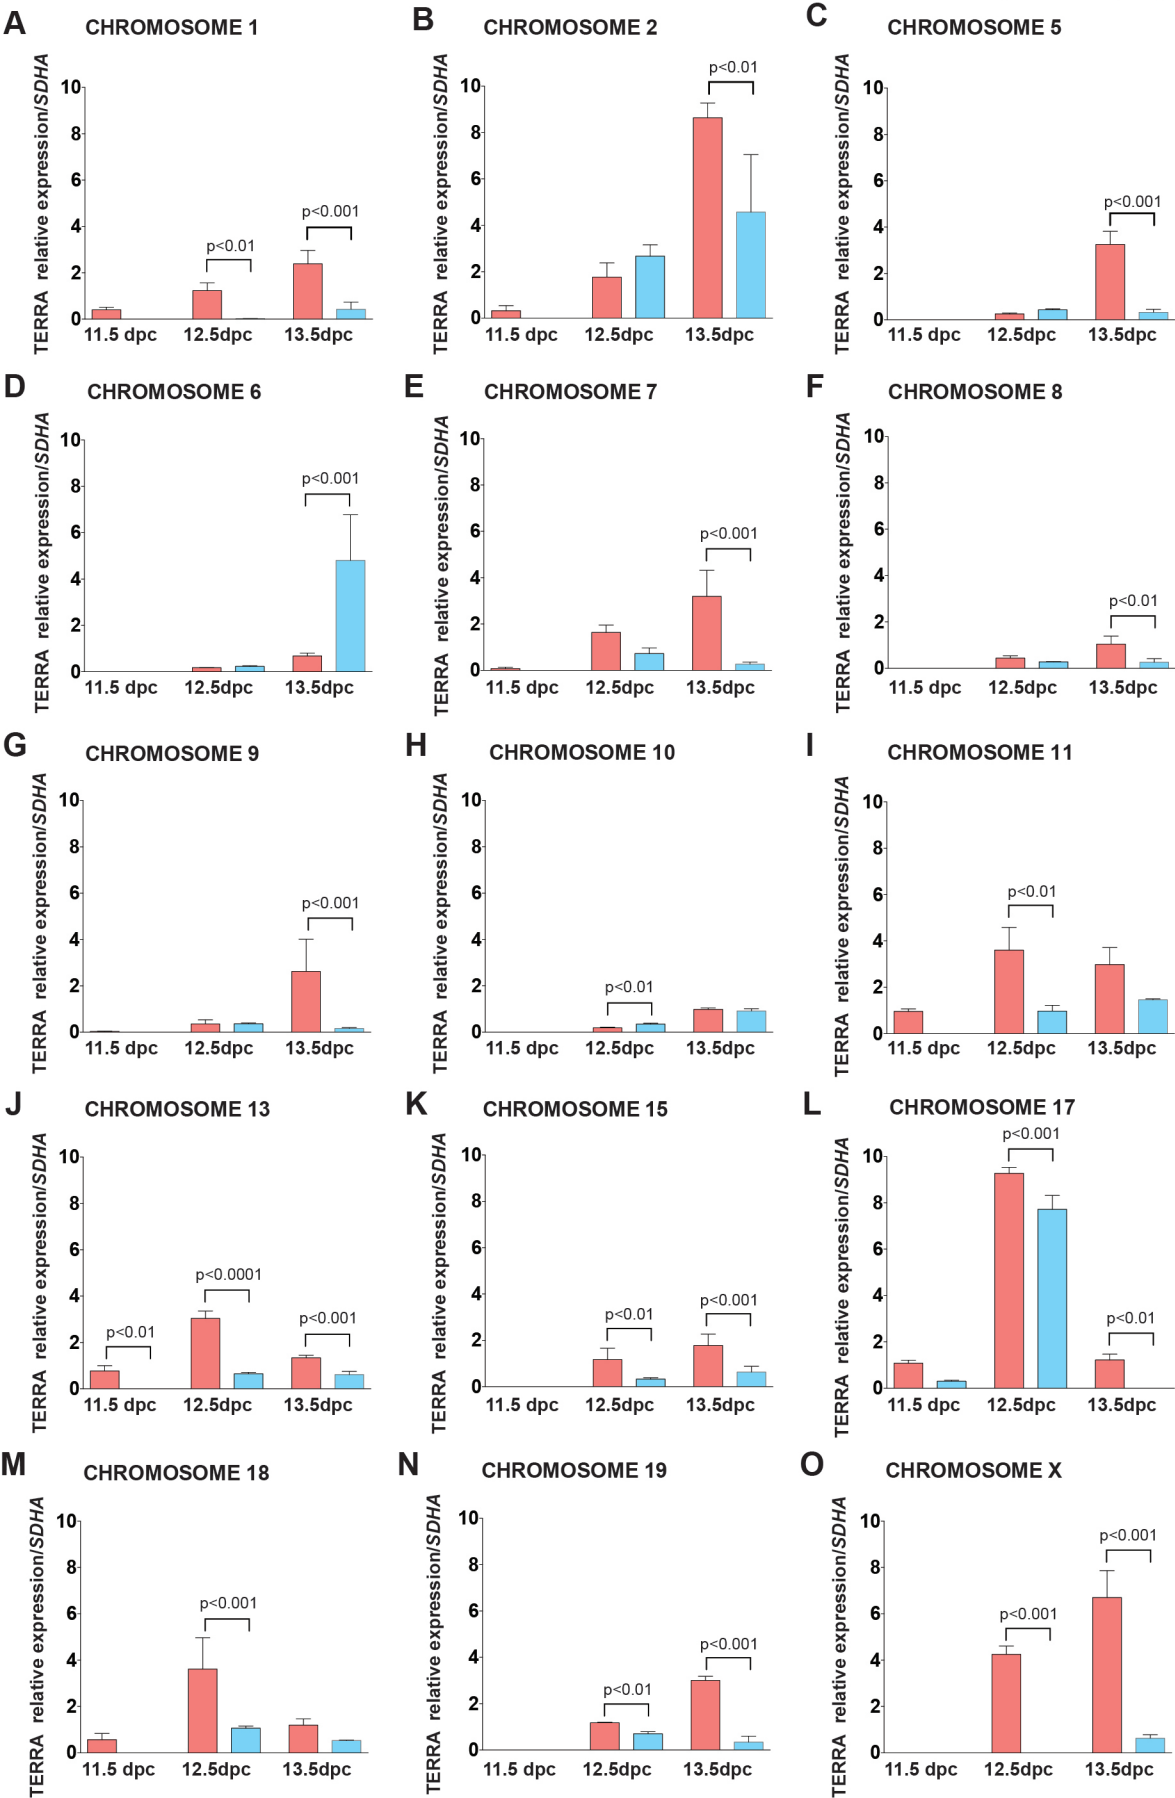

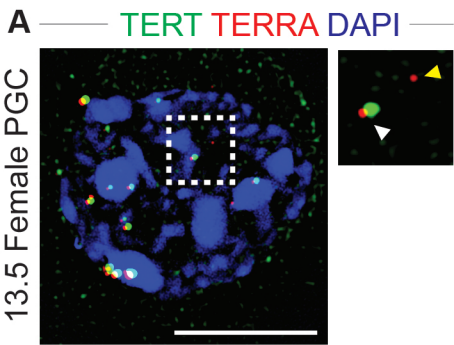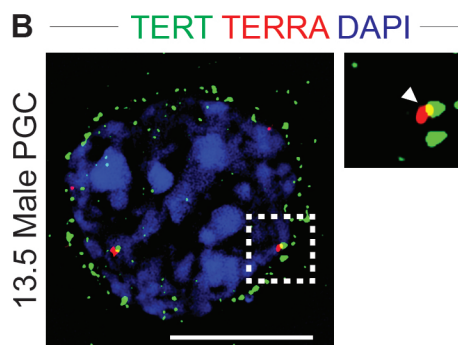

**C** ■ Female PGC ■ Male PGC

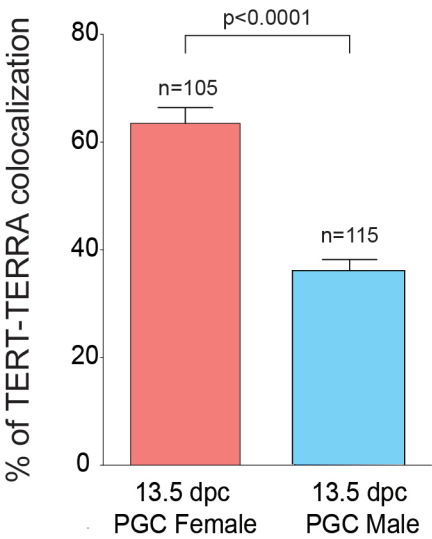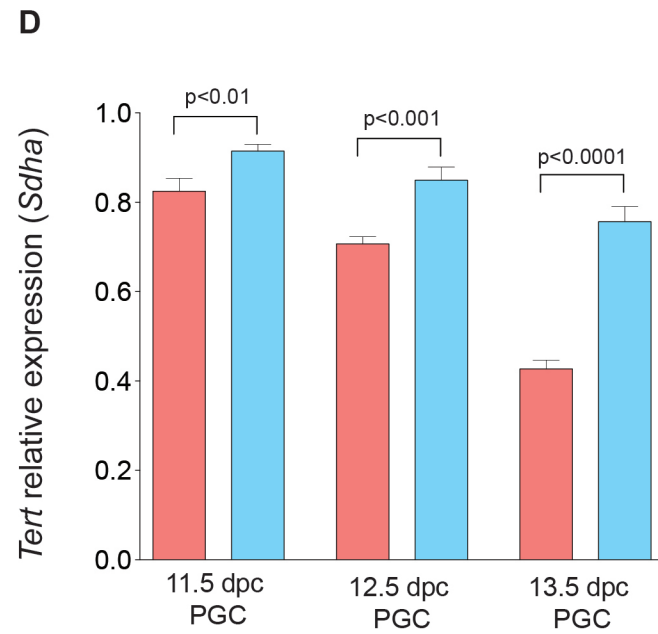

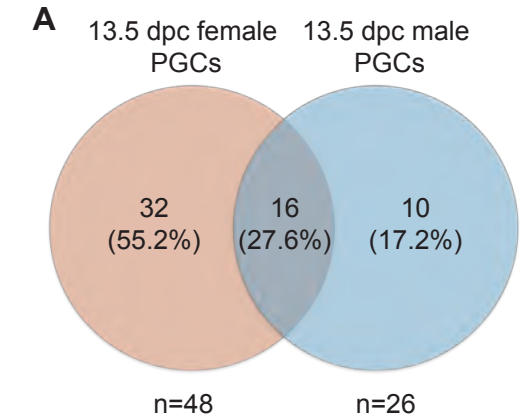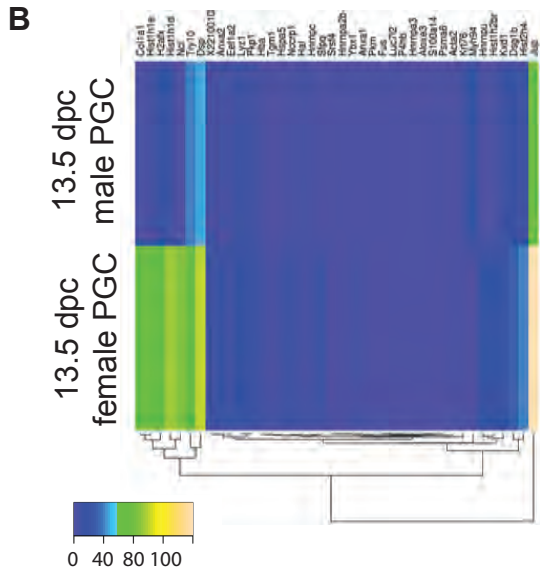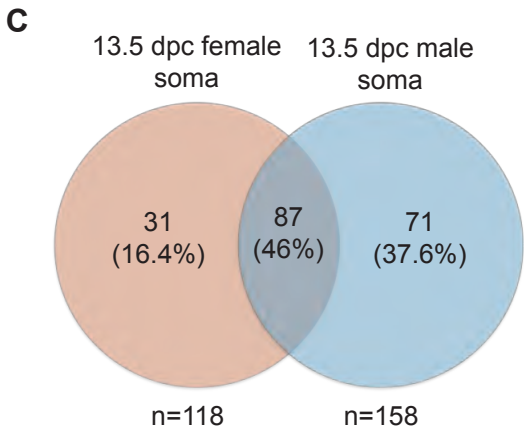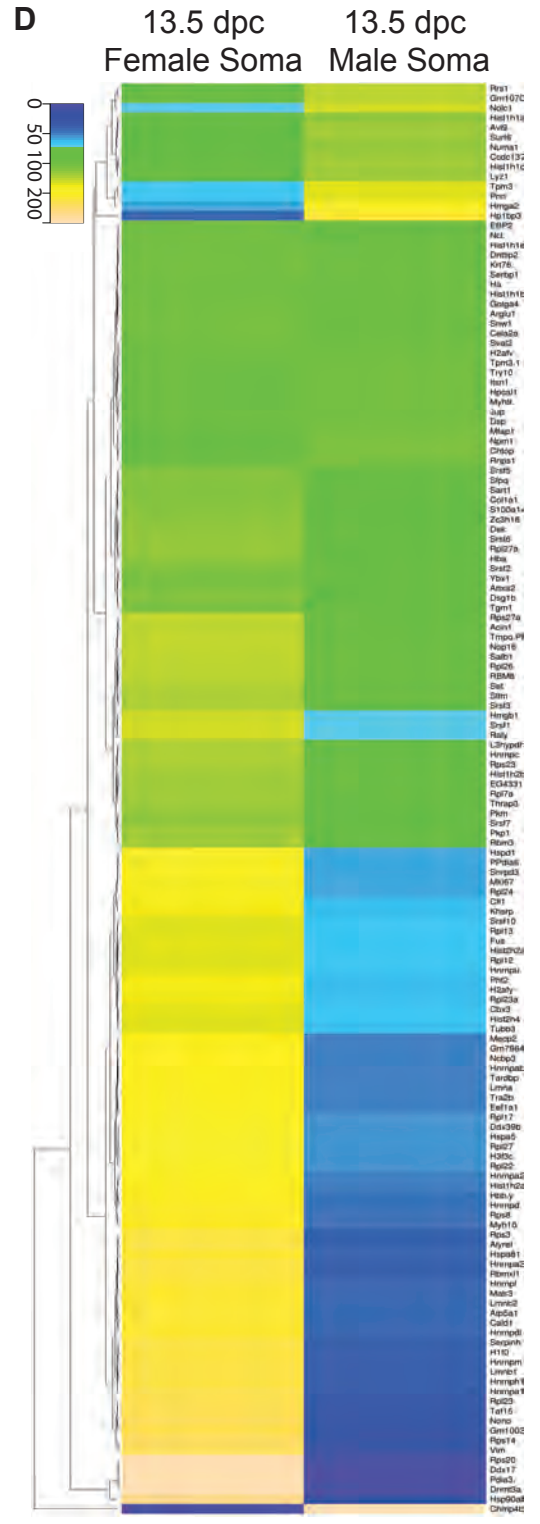



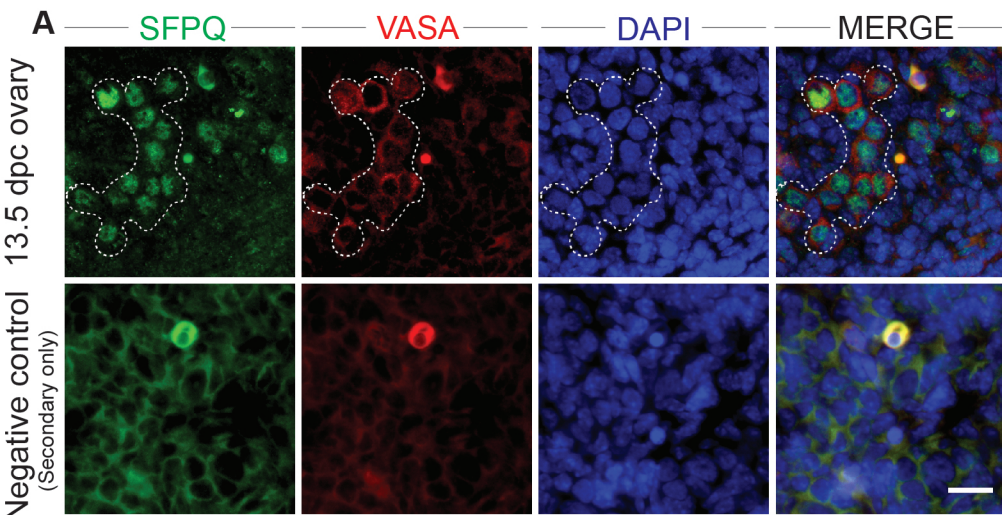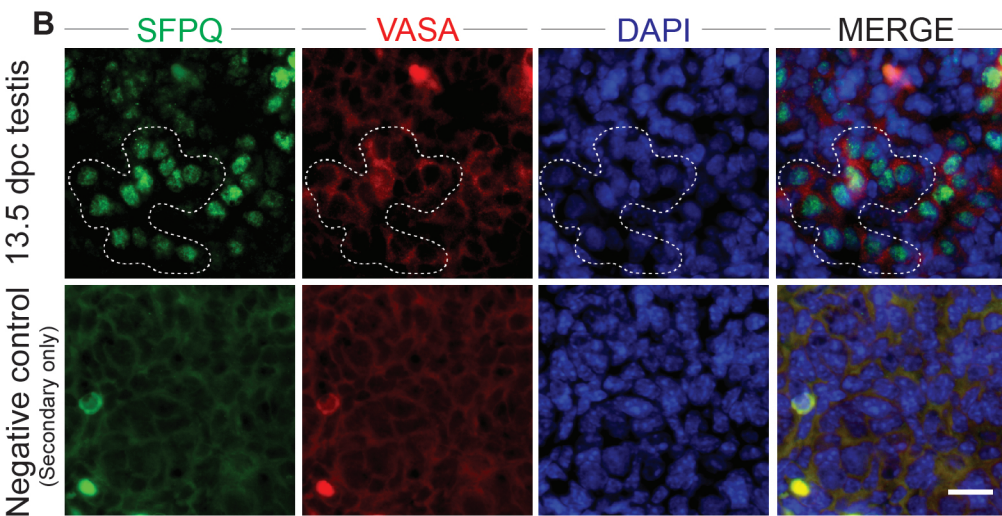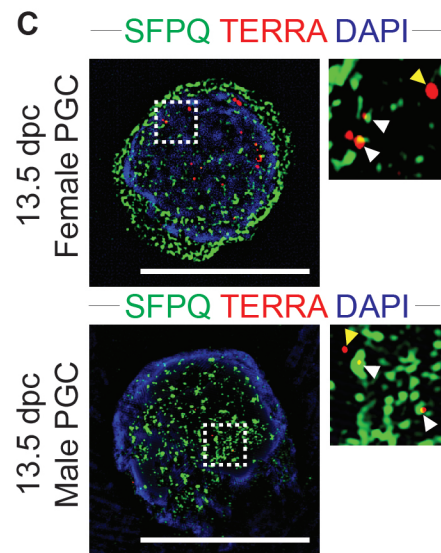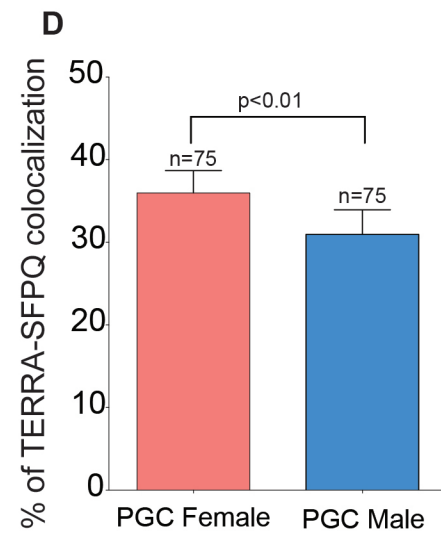

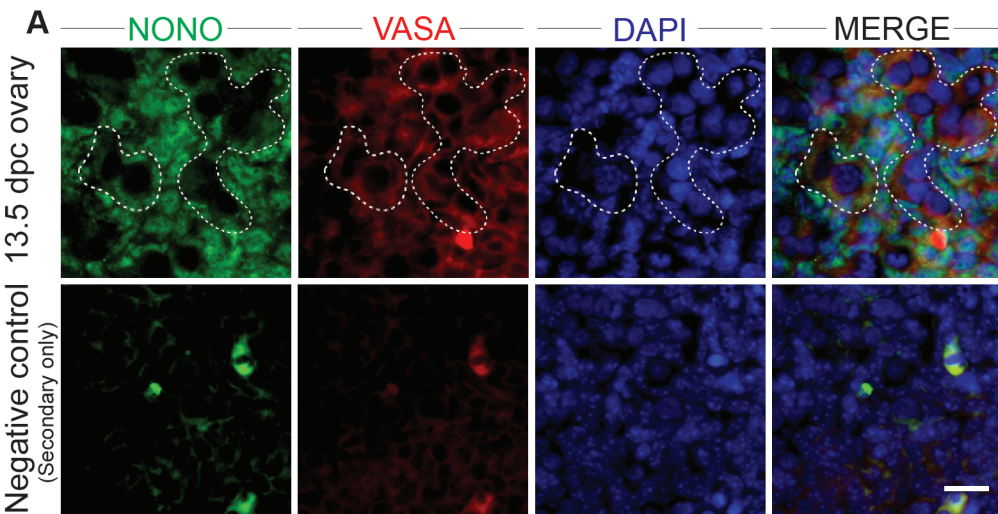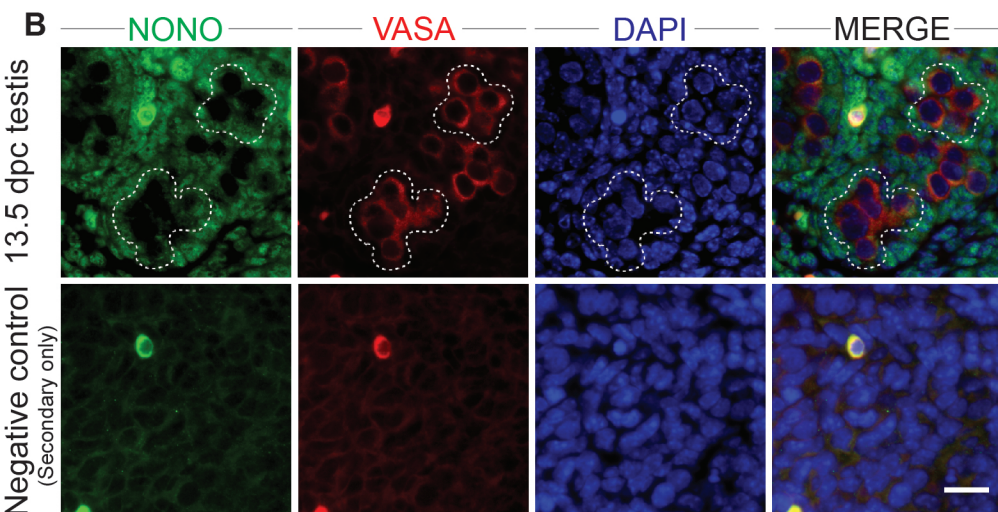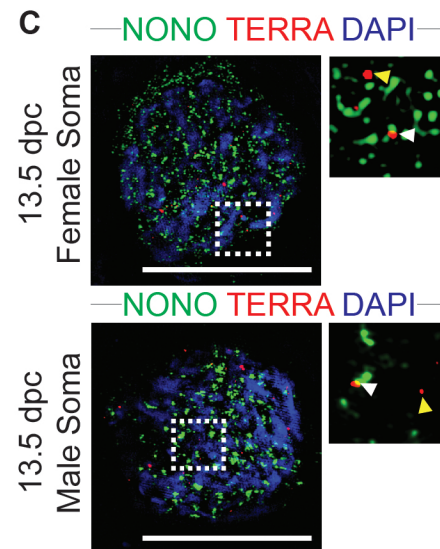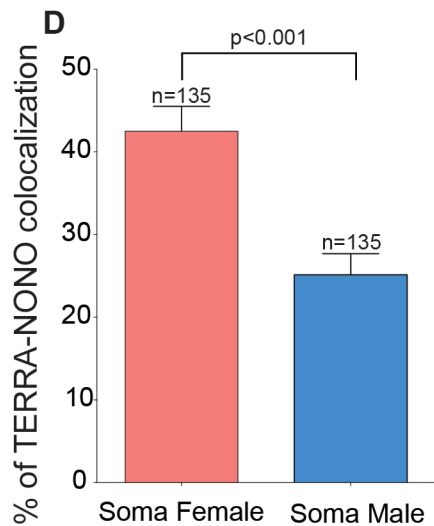

## SUPPLEMENTARY TABLE 1. PRIMERS USED IN THIS STUDY.

TERT

FWD TGAAAGTAGAGGATTGCCACTG

REV CCTCAGACGGTGCTCTGC

18S

FWD GCAATTATCCCCATGAACG

REV GGGACTTAATCAACGCAAGC

Chromosome 18

L-qPCR-Chr18 GCAAGCTCCGAAGTTGTGAT

R-qPCR-Chr18 CGCTTCTGTGAAGGATCCAG

TERRA

REV CCCTAACCCCTAACCCCTAACCCCTAA

U6:

FWD GCATGACGTCTGCTTTGGA

REV primer 5'-CCACAATCATTCTGCCATCA

L-Chr1-1 ATACACCCGGTTTGGATG

R-Chr1-1 CTTGTGGCTCTTGGTATCTT

L-Chr1-2 ACAAGCTGACCTGTGAGTTC

R-Chr1-2 ATCTGGGACAAAGGCAAG

L-chr2\_6 GAGTGCCTTACTATCTCCTAAGTTTT

R-chr2\_6 TGGAGTTAATTTTGTGGAGGTTG

L-Chr2-13 CGAGTCTCAGAAAAGGGCAG

R-Chr2-13 TCACCAATTCTCCAACAGGG

L-Chr5-7 GAAGACTGAGGCAGAAGAGTT

R-Chr5-7 TGAGATCCCTTGCTACTTGC

L-Chr5-8 CTGAACCTTGTAGTTCCTCTG

R-Chr5-8 CTGTGAAAGGGTCATTCAAC

L-chr6\_3 AGGTGTTCTGAGGCAAGCTC

R-chr6\_3 AAGACCCACCACACCAGTTC

L-Chr6-4 CTGCAATTGGGAAGAGCA

R-Chr6-4 CAGAGGGTTTCTCTCCAGTA

L-Chr7-1 GGGCTTTGTTATCTTGCTG

R-Chr7-1 AGAGTCATGTGGCTATCAGTC

L-Chr7-2 TAAGGACACAGGCCATACAC

R-Chr7-2 CCACTCAGCTCAGACATACA

L-Chr9-1 GCATGCTCATTGAAGACCAG  
R-Chr9-1 ATTGGTCTCTGAGGTCTTGC

L-Chr9-2 TGCCTCTCAAGTGCTGTT  
R-Chr9-2 GTAGGCATTGTGTCAGTCTCA

L-Chr11-7 TGTATTTGAAATTGATTATGAGAAGT  
R-Chr11-7 TAAAGCCTTTGTACATCAATATG

L-Chr11-8 GGCTTTACCACATTGACTACA  
R-Chr11-8 CTTTGCTTCTCCTGCTCAAC

L-Chr12-1 TTTGGCTACTGAGCAACTG  
R-Chr12-1 CCAGAAACGTTCCATACTAAC

L-Chr12-2 CAAGCTTTGTTCCCTCAG  
R-Chr12-2 AAAGCAATTTAAGATTTGTAGCA

L-Chr13-4 CAATGAAACTCCACCCACAG  
R-Chr13-4 TCTGCCTCACCATCTGTGTA

L-Chr13-5 CCAAGACCCAGCTTCTGATTC  
R-Chr13-5 TTTTGATGGTGTCTCTTGGGA  
L-Chr14-1 GAGCTCAGATGCATCACTGT  
R-Chr14-1 TTGATGAACAAAGGTCACTG

L-Chr14-2 TACCACCTACTAGCCTCCAGT  
R-Chr14-2 GAGTATGACCTAACCCTGACTC

L-Chr15-1 CAGAATGGGTCAAGGATAGC  
R-Chr15-1 CTCAAGTGCTGAAGGATGAC

L-Chr15-2 CTTCCCTTCCCTCTTCTGTA  
R-Chr15-2 TGGGTTAGACCTTATCTGAGTT

L-Chr16-1 TGTAATTGGAGAGTACTATGATATGC  
R-Chr16-1 ATTACACATACTGGAGAGAAATCTTAC

L-Chr16-2 CATGTGTAAGGTTTCTCTCCAGT  
R-Chr16-2 CAATGTAGTAAATCCTTTGCTTCTC

L-Chr19-1 GTCTCCAACATCACATCTCTG  
R-Chr19-1 GATGTGCATGTGAACCTTACTC

L-Chr19-2 CTTACATTCATAGGGTTTCTCTCTAGT  
R-Chr19-2 GTGGTAAAGCCTTTGCATATCATAC

L-ChrX-1 GAGGTTCCCTGTAAGTCTCCA  
R-ChrX-1 CCTATGATGATGTGCATGTG

L-ChrX-2 GTTACAGAGAACTCGCATCTTC  
R-ChrX-2 GGGCAATACCCTTTGTCC

L\_Chr8-1 TCAATGCATCAGCAGCAG  
R\_Chr8-1 GGTAATGTTGCCTGATGAGC

L-Chr8-B ATGAGCAGGTAATGAACTCTG  
R\_Chr8-B GTGTGGGAGGATAGTCATGTA

L\_Chr10-seg1 GTCTCAAGTGAAACAGACTGC  
R\_Chr10-seg1 GCAGTTCCAGAAAGATCACTG  
L\_Chr10-seg2 TCAGCAAATCATGGTTCAGAT

R\_Chr17\_1 TCTCAAGTGAAACAGACTGC  
L\_Chr17EST TGTCAAAGTTCCAGAAAACATGG  
R-Chr17EST CTTTTGGGGATGACTGTGACAT

L-qPCR-Chr18 GCAAGCTCCGAAGTTGTGAT  
R-qPCR-Chr18 CGCTTCTGTGAAGGATCCAG

L-qPCR-Chr8 TCCCAGTGTCAATAACAGAC  
R-qPCR-Chr8 CAAGCACAGGCTAGAAGTG

L-qPCR-Chr10 TCAGCAAATCATGGTTCAGAT  
R-qPCR-Chr10 TGCATTGCATTTGACAACAG

L-qPCR\_Chr17 TGTCAAAGTTCCAGAAAACATGG  
R-qPCR\_Chr17 CTTTTGGGGATGACTGTGACAT

L-Jarid1d CTGAAGCTTTTTGGCTTTGAG  
R-Jarid1d CCACTGCCAAATTCTTTGG

L-SRY GAGAGCATGGAGGGCCATG  
R-SRY GAGTACAGGTGTGCAGCTC

L-Sry2 CTCTGAAGAAGAGACAAGTT  
R-Sry2 CTGTGTAGGATCTTCAATC

**SUPPLEMENTARY TABLE 2. PGC PROTEIN RATIOS FROM IDRIP (m/f)**

| Checked | Protein ID | Accession | Description                                                                    | Sum PEP S | Coverage | # Peptides | # PSMs | # Unique P | # Protein G | # AAs | MW [kDa] | calc. pI | Score Seq | # Peptides | Abundance Ratio (F32, S) |
|---------|------------|-----------|--------------------------------------------------------------------------------|-----------|----------|------------|--------|------------|-------------|-------|----------|----------|-----------|------------|--------------------------|
| TRUE    | High       | P04104    | Keratin, type II cytoskeletal 1 OS=Mus musculus GN=Krt1 PE=1 SV=4              | 37.142    | 7        | 8          | 94     | 1          | 1           | 637   | 65.6     | 8.15     | 212.15    | 8          |                          |
| TRUE    | High       | E9Q557    | Desmoplakin OS=Mus musculus GN=Dsp PE=1 SV=1                                   | 35.364    | 5        | 12         | 24     | 12         | 1           | 2883  | 332.7    | 6.8      | 61.43     | 12         | 0.648                    |
| TRUE    | High       | Q02257    | Junction plakoglobin OS=Mus musculus GN=Jup PE=1 SV=3                          | 29.84     | 21       | 12         | 21     | 12         | 1           | 745   | 81.7     | 6.14     | 58.11     | 12         | 0.469                    |
| TRUE    | High       | Q3UV17    | Keratin, type II cytoskeletal 2 oral OS=Mus musculus GN=Krt76 PE=1 SV=1        | 23.5      | 12       | 10         | 31     | 1          | 1           | 594   | 62.8     | 8.43     | 74.03     | 10         | 4.188                    |
| TRUE    | High       | P09405    | Nucleolin OS=Mus musculus GN=Ncl PE=1 SV=2                                     | 20.188    | 17       | 9          | 9      | 9          | 1           | 707   | 76.7     | 4.75     | 26.79     | 9          | 0.01                     |
| TRUE    | High       | P43274    | Histone H1.4 OS=Mus musculus GN=Hist1h1e PE=1 SV=2                             | 20.005    | 18       | 8          | 11     | 2          | 1           | 219   | 22       | 11.11    | 29.87     | 8          | 0.047                    |
| TRUE    | High       | Q14929    | Histone H1.3 OS=Mus musculus GN=Hist1h1d PE=1 SV=1                             | 18.988    | 19       | 9          | 12     | 3          | 1           | 221   | 22.1     | 11.03    | 30.29     | 9          | 0.108                    |
| TRUE    | High       | P97350    | Plakophilin-1 OS=Mus musculus GN=Pkp1 PE=1 SV=1                                | 10.687    | 7        | 3          | 6      | 3          | 1           | 728   | 80.8     | 8.91     | 21.96     | 3          | 0.499                    |
| TRUE    | High       | P11087    | Collagen alpha-1(I) chain OS=Mus musculus GN=Col1a1 PE=1 SV=4                  | 9.173     | 3        | 3          | 11     | 3          | 1           | 1453  | 137.9    | 5.85     | 33.95     | 3          | 0.027                    |
| TRUE    | High       | P07356    | Annexin A2 OS=Mus musculus GN=Anxa2 PE=1 SV=2                                  | 7.363     | 12       | 3          | 4      | 3          | 1           | 339   | 38.7     | 7.69     | 11.22     | 3          | 0.424                    |
| TRUE    | High       | B2RTM0    | Histone H4 OS=Mus musculus GN=Hist2h4 PE=1 SV=1                                | 7.197     | 21       | 2          | 4      | 2          | 1           | 103   | 11.4     | 11.36    | 11.04     | 2          | 0.205                    |
| TRUE    | High       | Q792Z1    | MCG140784 OS=Mus musculus GN=Try10 PE=1 SV=1                                   | 6.316     | 15       | 2          | 4      | 2          | 1           | 246   | 26.2     | 5.83     | 12.05     | 2          | 0.569                    |
| TRUE    | High       | P62960    | Nuclease-sensitive element-binding protein 1 OS=Mus musculus GN=Ybx1 PE=1 SV=3 | 6.274     | 20       | 2          | 2      | 2          | 1           | 322   | 35.7     | 9.88     | 7.24      | 2          | 0.01                     |
| TRUE    | High       | B2RXW1    | Histidine ammonia-lyase OS=Mus musculus GN=Hal PE=1 SV=1                       | 5.71      | 3        | 2          | 2      | 2          | 1           | 657   | 72.2     | 6.34     | 5.98      | 2          | 0.598                    |
| TRUE    | High       | P20029    | 78 kDa glucose-regulated protein OS=Mus musculus GN=Hspa5 PE=1 SV=3            | 5.104     | 4        | 2          | 3      | 2          | 1           | 655   | 72.4     | 5.16     | 10.52     | 2          | 0.265                    |
| TRUE    | High       | A0A0A0MC  | F-box only protein 50 OS=Mus musculus GN=Nccrp1 PE=1 SV=1                      | 4.933     | 5        | 2          | 2      | 2          | 1           | 291   | 33       | 6.89     | 7.74      | 2          | 0.397                    |
| TRUE    | High       | P62737    | Actin, aortic smooth muscle OS=Mus musculus GN=Acta2 PE=1 SV=1                 | 4.648     | 7        | 2          | 2      | 1          | 1           | 377   | 42       | 5.39     | 5.95      | 2          | 100                      |
| TRUE    | High       | B2RQH0    | Desmoglein 1 beta OS=Mus musculus GN=Dsg1b PE=1 SV=1                           | 4.449     | 2        | 2          | 4      | 2          | 1           | 1060  | 114.4    | 4.84     | 14.92     | 2          | 0.411                    |
| TRUE    | High       | Q8VIJ6    | Splicing factor, proline- and glutamine-rich OS=Mus musculus GN=Sfpq PE=1 SV=1 | 4.371     | 4        | 2          | 2      | 2          | 1           | 699   | 75.4     | 9.44     | 5.86      | 2          | 0.01                     |
| TRUE    | High       | P27661    | Histone H2AX OS=Mus musculus GN=H2afx PE=1 SV=2                                | 3.495     | 11       | 2          | 3      | 2          | 1           | 143   | 15.1     | 10.74    | 7.44      | 2          | 0.198                    |
